# Supplementary material for: How well can we quantify when 1.5 °C of global warming has been exceeded?
Source: Copernicus journal article supplement (doi:10.5194/essd-2025-825), 2026-01-28
Supplement: Supplementary file 1 [file essd-2025-825-supplement.pdf]

# Supplement for “How well can we quantify when 1.5°C of global warming has been exceeded?”

Peter W. Thorne<sup>1</sup>, John M. Nicklas<sup>2</sup>, John J. Kennedy<sup>3</sup>, Bruce Calvert<sup>4</sup>, Baylor Fox-Kemper<sup>2</sup>, Mark T.  
5 Richardson<sup>5</sup>, Adrian Simmons<sup>6</sup>, Ed Hawkins<sup>7</sup>, Robert Rohde<sup>8</sup>, Kathryn Cowtan<sup>9</sup>, Nerilie J. Abram<sup>10</sup>, Axel  
Andersson<sup>11</sup>, Simon Noone<sup>1</sup>, Phillipe Marbaix<sup>12, 55</sup>, Nathan Lenssen<sup>13</sup>, Dirk Olonscheck<sup>14</sup>, Tristram  
Walsh<sup>15</sup>, Stephen Outten<sup>16</sup>, Ingo Bethke<sup>17</sup>, Bjorn H. Samset<sup>18</sup>, Chris Smith<sup>19,57</sup>, Anna Pirani<sup>20</sup>, Jan  
Fuglestad<sup>18</sup>, Lavanya Rajamani<sup>21</sup>, Richard A. Betts<sup>22</sup>, Elizabeth C. Kent<sup>23</sup>, Blair Trewin<sup>24</sup>, Colin  
Morice<sup>22</sup>, Tim Osborn<sup>25</sup>, Samantha N Burgess<sup>6</sup>, Oliver Geden<sup>26</sup>, Andrew Parnell<sup>27</sup>, Piers M. Forster<sup>28</sup>,  
10 Chris Hewitt<sup>23,29</sup>, Zeke Hausfather<sup>30</sup>, Valerie Masson-Delmotte<sup>31</sup>, Jochem Marotzke<sup>14</sup>, Nathan Gillett<sup>32</sup>,  
Sonia I. Seneviratne<sup>33</sup>, Gavin A. Schmidt<sup>34</sup>, Duo Chan<sup>35</sup>, Stefan Brönnimann<sup>36</sup>, Andy Reisinger<sup>37</sup>,  
Matthew Menne<sup>38</sup>, Maisa Rojas Corradi<sup>39</sup>, Christopher Kadow<sup>40</sup>, Peter Huybers<sup>41</sup>, David B. Stephenson<sup>42</sup>,  
Emily Wallis<sup>25</sup>, Joeri Rogelj<sup>43</sup>, Andrew Schurer<sup>44</sup>, Karen McKinnon<sup>45</sup>, Panmao Zhai<sup>46</sup>, Fatima  
Driouech<sup>47</sup>, Wilfran Moufouma Okia<sup>29</sup>, Saeed Vazifehkhah<sup>29</sup>, Sophie Szopa<sup>48</sup>, Christopher J. Merchant<sup>49</sup>,  
15 Shoji Hirahara<sup>50</sup>, Masayoshi Ishii<sup>50,58</sup>, Francois A. Engelbrecht<sup>51</sup>, Qingxiang Li<sup>52</sup>, June-Yi Lee<sup>53</sup>, Alex J.  
Cannon<sup>54</sup>, C. Cassou<sup>56</sup>, K. von Schuckmann<sup>59</sup>, Amir H. Delju<sup>29</sup>, Ellie Murtagh<sup>1</sup>

<sup>1</sup> ICARUS Climate Research Centre, Maynooth University, Maynooth, Co. Kildare, Ireland

<sup>2</sup> Department of Earth, Environmental, and Planetary Sciences, Brown University, Providence, RI, USA

20 <sup>3</sup> Independent researcher, France

<sup>4</sup> Independent Researcher, Ottawa, Canada

<sup>5</sup> Jet Propulsion Laboratory, California Institute of Technology, Pasadena, CA, USA

<sup>6</sup> European Centre for Medium-Range Weather Forecasts, Reading, UK.

<sup>7</sup> National Centre for Atmospheric Science, Department of Meteorology, University of Reading, Reading,  
25 UK.

<sup>8</sup> Berkeley Earth, Berkeley, CA, USA

<sup>9</sup> Department of Chemistry, University of York, York, UK

- <sup>10</sup> ARC Centre of Excellence for the Weather of the 21st Century, Research School of Earth Sciences, The Australian National University, Canberra ACT 2601, Australia.
- 30 <sup>11</sup> German Meteorological Service, Hamburg, Germany
- <sup>12</sup> Division of Thermodynamics and Fluid Dynamics, Université catholique de Louvain, Louvain-la-Neuve, Belgium
- <sup>13</sup> Colorado School of Mines, Golden Colorado, USA & NSF National Center for Atmospheric Research, Boulder, Colorado, USA
- 35 <sup>14</sup> Max Planck Institute for Meteorology, Hamburg, Germany
- <sup>15</sup> Environmental Change Institute, University of Oxford, Oxford, UK
- <sup>16</sup> Nansen Environmental and Remote Sensing Center, Bjerknes Centre for Climate Research, Bergen, Norway <https://orcid.org/0000-0002-4883-611X>
- <sup>17</sup> University of Bergen, Bjerknes Centre for Climate Research, Bergen, Norway
- 40 <sup>18</sup> CICERO Center for International Climate Research, Oslo, Norway
- <sup>19</sup> Department of Water and Climate, Vrije Universiteit Brussel, Brussels, Belgium
- <sup>20</sup> Euro-Mediterranean Centre on Climate Change (CMCC Foundation), Venice, Italy
- <sup>21</sup> Faculty of Law, University of Oxford
- <sup>22</sup> Met Office Hadley Centre, Fitzroy Road, Exeter, UK
- 45 <sup>23</sup> National Oceanography Centre, Southampton, UK
- <sup>24</sup> Bureau of Meteorology, Melbourne, Australia
- <sup>25</sup> Climatic Research Unit, School of Environmental Sciences, University of East Anglia, Norwich, UK
- <sup>26</sup> German Institute for International and Security Affairs, Berlin, Germany
- <sup>27</sup> School of Mathematics and Statistics, University College Dublin, Dublin, Ireland
- 50 <sup>28</sup> Priestley Centre for Climate Futures, University of Leeds, Leeds, UK
- <sup>29</sup> WMO Secretariat, World Meteorological Organization, Geneva, Switzerland
- <sup>30</sup> Stripe Inc., South San Francisco, CA, USA and Berkeley Earth, Berkeley, CA, USA
- <sup>31</sup> Laboratoire des Sciences du Climat et de l'Environnement (UMR 8212 CEA-CNRS-UVSQ), Institut Pierre Simon Laplace, Université Paris-Saclay, France

- 55 <sup>32</sup> Canadian Centre for Climate Modelling and Analysis, Environment and Climate Change Canada,  
Victoria, BC, Canada.
- <sup>33</sup> Institute for Atmospheric and Climate Science, ETH Zurich, Zurich, Switzerland
- <sup>34</sup> NASA Goddard Institute for Space Studies, New York, NY, USA
- <sup>35</sup> School of Ocean and Earth Science, University of Southampton, UK
- 60 <sup>36</sup> Institute of Geography and Oeschger Centre for Climate Change Research, University of Bern,  
Switzerland
- <sup>37</sup> Institute for Climate, Energy and Disaster Solutions, Australian National University, Acton ACT,  
Australia
- <sup>38</sup> NOAA's National Centers for Environmental Information, 151 Patton Avenue, Asheville, NC, USA
- 65 <sup>39</sup> Department of Geophysics, Faculty of Engineering, University of Chile, Santiago, Chile.
- <sup>40</sup> German Climate Computing Center (DKRZ), Hamburg, Germany
- <sup>41</sup> Department of Earth and Planetary Sciences, Harvard University, Cambridge, MA, USA
- <sup>42</sup> Department of Mathematics and Statistics, University of Exeter, Exeter, UK
- <sup>43</sup> Grantham Institute - Climate Change and the Environment, and Centre for Environmental Policy,  
70 Imperial College, London, UK
- <sup>44</sup> School of GeoSciences, University of Edinburgh, UK
- <sup>45</sup> Department of Statistics and Data Science, Department of Atmospheric and Oceanic Sciences, Institute  
of the Environment and Sustainability, University of California, Los Angeles
- <sup>46</sup> State Key Laboratory of Severe Weather Meteorological Science and technology, Chinese Academy of  
75 Meteorological Sciences, Beijing, China
- <sup>47</sup> University Mohammed VI Polytechnic, Ben Guerir, Morocco
- <sup>48</sup> Laboratoire des Sciences du Climat et de l'Environnement (UMR 8212 CEA-CNRS-UVSQ), Institut  
Pierre Simon Laplace, Université Paris-Saclay, France
- <sup>49</sup> National Centre for Earth Observation, University of Reading, Reading, UK
- 80 <sup>50</sup> Meteorological Research Institute, Tsukuba, Japan
- <sup>51</sup> Global Change Institute, University of the Witwatersrand, Johannesburg, South Africa
- <sup>52</sup> Sun Yat-Sen University, Guangzhou/Zhuhai, China

- <sup>53</sup> Research Center for Climate Sciences, Pusan National University and Center for Climate Physics, Institute for Basic Science, Busan, Republic of Korea
- 85 <sup>54</sup> Climate Research Division, Environment and Climate Change Canada, Victoria, BC, Canada.
- <sup>55</sup> Department of Geography, University of Liège, Belgium
- <sup>56</sup> LMD-IPSL, CNRS, Ecole Normale Supérieure, PSL Research University, Paris, 75005, France
- <sup>57</sup> Energy, Climate and Environment Program, International Institute for Applied Systems Analysis, Laxenburg, Austria
- 90 <sup>58</sup> Geoenvironmental Sciences, University of Tsukuba, Tsukuba, Japan
- <sup>59</sup> Mercator Ocean international, Toulouse, France

*Correspondence to:* Peter W. Thorne, peter@peter-thorne.net

- 95 This Supplement contains supplementary information in support of the main paper. Supplementary material is provided principally for Sections 4.6 and 5 where further details that were not possible to fit within the main analysis are given.

### 1 Commonly used acronyms

Table S1 lists acronyms used frequently in the main paper and their definitions.

100

| Acronym | Acronym longform / description and key references where necessary                        |
|---------|------------------------------------------------------------------------------------------|
| CGWL    | Current Global Warming Level (specifically Betts et al. 2023 method)                     |
| ENSO    | El Niño Southern Oscillation                                                             |
| EOF     | Empirical Orthogonal Function                                                            |
| EOT     | Empirical Orthogonal Teleconnection                                                      |
| ESM     | Earth System Model                                                                       |
| FaIR    | Finite Amplitude Impulse Response simple climate model (Smith et al., 2017, 2024 method) |
| GMST    | Global Mean Surface Temperature                                                          |
| GSAT    | Global Surface Air Temperature                                                           |

|                                 |                                                                               |
|---------------------------------|-------------------------------------------------------------------------------|
| GWJ                             | Global Warming Index (Haustein et al., 2017 & Forster et al. 2024 method)     |
| GWL                             | Global Warming Level                                                          |
| ICV                             | Internal Climate Variability                                                  |
| ICJ                             | International Court of Justice                                                |
| IMO-WMO<br>(sometimes just WMO) | International Meteorological Organisation / World Meteorological Organization |
| IPCC                            | Intergovernmental Panel on Climate Change                                     |
| KCC                             | Kriging for Climate Change (Qasmi and Ribes 2022 method)                      |
| LSAT                            | Land Surface Air Temperatures                                                 |
| LTTG                            | Long-Term Temperature Goal                                                    |
| MAT                             | Marine Air Temperatures                                                       |
| NMAT                            | Night Marine Air Temperatures                                                 |
| OLS                             | Ordinary Least Squares regression                                             |
| PA                              | Paris Agreement                                                               |
| PAGES                           | Past Global Changes                                                           |
| PDF                             | Probability Density Function                                                  |
| RFC                             | Reasons for Concern                                                           |
| ROF                             | Regularised Optimal Fingerprinting (Gillett et al., 2021 method)              |
| SED                             | Structured Expert Dialogue                                                    |
| SLCF                            | Short Lived Climate Forcers                                                   |
| SMILE                           | Single Model Initialised Large Ensemble                                       |
| SST                             | Sea Surface Temperature                                                       |
| UNFCCC                          | United Nations Framework Convention on Climate Change                         |
| VEI                             | Volcanic Explosivity Index                                                    |

**Table S1. List of acronyms commonly used in the paper**

## 2 Supplementary Information for Section 4.6

### 2.1 Summary of methods considered in Section 4.6

105 The methods used throughout Section 4.6 are outlined in Table S2 with back references to the sections in Section 4 in which they are either discussed or the method class is outlined. While very many methods have been considered this set is not entirely comprehensive. Some published methods we were unable to contact the authors or to get working. A further subset of methods were also unable to be modified to be applied to the synthetic future cases detailed in Section 4.6.2.

110 Code to be able to run all methods run in this analysis, except for GWI, are made available at [https://github.com/jnickla1/Thorne\\_15](https://github.com/jnickla1/Thorne_15). GWI approach information can be found at <https://github.com/tristramwalsh/global-warming-index>

| Method short name used in figures in main text | Description                                                     | Reference                             | Limited application to or \$ if included in its own figure | Described in main text section |
|------------------------------------------------|-----------------------------------------------------------------|---------------------------------------|------------------------------------------------------------|--------------------------------|
| cent20y                                        | Average of 19- and 21--yr centred                               |                                       | \$(Fig 14)                                                 | 4.3/1_Run_Means                |
| cent21y                                        | 21-yr centred                                                   |                                       |                                                            | 4.3/1_Run_Means                |
| cent30y                                        | Average of 29- and 31--yr centred                               |                                       | \$(Fig 14)                                                 | 4.3/1_Run_Means                |
| lag5y                                          | 5-yr lagging                                                    |                                       |                                                            | 4.3/1_Run_Means                |
| lag10y                                         | 10-yr lagging                                                   | AR6                                   | \$(Fig 14)                                                 | 4.3/1_Run_Means                |
| OLS_refit                                      | OLS refitting                                                   | AR5                                   | \$(Fig 14)                                                 | 4.3/2_LT_Fits                  |
| OLS_AR5all                                     | OLS AR5 all                                                     | AR5                                   |                                                            | 4.3/2_LT_Fits                  |
| OLS_AR5split                                   | OLS AR5 split                                                   |                                       |                                                            | 4.3/2_LT_Fits                  |
| TheilSen_h7075                                 | Theil Sen slope after hinge fit 1975                            | Duan et al., 2021                     |                                                            | 4.3/2_LT_Fits                  |
| OLS_hinge75                                    | OLS Hinge fit 1975 (refitting mt+b)                             | Livezey et. al. 2007                  |                                                            | 4.3/2_LT_Fits                  |
| hinge75meet                                    | Hinge fit meet (refitting mt, b fixed)                          | (to make lines meet)                  | \$(Fig 14)                                                 | 4.3/2_LT_Fits                  |
| quartic                                        | quartic polynomial                                              | Hawkins and Sutton 2009               |                                                            | 4.3/2_LT_Fits                  |
| Bayes_seq_CP                                   | Bayesian change-point                                           | Yu and Ruggieri, 2019                 |                                                            | 4.3/2_LT_Fits                  |
| offset11y                                      | 11-yr offset                                                    | Trewin (2022)                         | \$(Fig 14)                                                 | 4.3/3_ST_Fits                  |
| etrend15y                                      | 15-yr trend endpoint                                            | SR15 Allen et al., 2018               | \$(Fig 14)                                                 | 4.3/3_ST_Fits                  |
| etrend30y                                      | 30-year trend endpoint                                          |                                       |                                                            | 4.3/3_ST_Fits                  |
| etrend30y_C3S                                  | End of 30-year trend C3S                                        |                                       |                                                            | 4.3/3_ST_Fits                  |
| min_month_proj                                 | Projection into the future from the minimum monthly temperature | Cannon, 2025<br>Bevacqua et al., 2025 | obs                                                        | 4.3/3_ST_Fits                  |

|                                                                                        |                                                                                                                                   |                                                       |            |                 |
|----------------------------------------------------------------------------------------|-----------------------------------------------------------------------------------------------------------------------------------|-------------------------------------------------------|------------|-----------------|
|                                                                                        | observed over the past year                                                                                                       |                                                       |            |                 |
| lowess1dt10wnc<br>lowess1dt20wnc<br>lowess1dt26wnc<br>lowess1dt30wnc<br>lowess1dt36wnc | LOWESS linear, tricube kernel (width 10, 20, or 30), standard error not corrected                                                 | Clarke & Richardson (2021)                            |            | 4.3/3_ST_Fits   |
| lowess2dt20wnc                                                                         | LOWESS quadratic, tricube kernel, width 20, standard error not corrected                                                          |                                                       |            | 4.3/3_ST_Fits   |
| lowess1dg20wnc                                                                         | LOWESS linear, gaussian kernel, width 20, standard error not corrected                                                            |                                                       |            | 4.3/3_ST_Fits   |
| lowess1dt20wAR                                                                         | LOWESS linear, tricube kernel (width 20), standard error corrected via AR(1) coefficient                                          | Clarke & Richardson (2021) recommended (eq 5, 6, 11)  |            | 4.3/3_ST_Fits   |
| lowess1dt20wARMA                                                                       | LOWESS linear, tricube kernel (width 20), standard error corrected via ARMA parameters using MLE                                  | Clarke & Richardson 2021, referencing Hausfather 2017 |            | 4.3/3_ST_Fits   |
| butterworth                                                                            | Butterworth                                                                                                                       | Mann (2008)                                           | \$(Fig 14) | 4.3/2_LT_Fits   |
|                                                                                        | Empirical Mode Decomposition                                                                                                      | Wu 2011                                               | none       | 4.3/3_ST_Fits   |
| opt_clim_norm                                                                          | Optimal climate normal                                                                                                            | Livezey et. al. 2007                                  |            | 4.3/3_ST_Fits   |
| cubic_spline                                                                           | Cubic spline                                                                                                                      | Vissier 2018                                          |            | 4.3/4_GAM_AR1   |
| GAM_AR1                                                                                | GAM AR1 residuals                                                                                                                 | AR5, box 2.2                                          | \$(Fig 14) | 4.3/4_GAM_AR1   |
| GAM_AR0                                                                                | GAM AR0 (standard)                                                                                                                |                                                       |            | 4.3/2_LT_Fits   |
| Kalman_RW<br>Kalman_RW_ocn<br>Kalman_EM_linRW                                          | Kalman: Std Random Walk on GMST alone, on GMST and GSST, and using expectation maximization (EM) on the parameters of GMST & GSST | Shumway and Stoffer (2016)                            |            | 4.3/5_Kalman    |
| Kal_flexLin<br>Kal_flexLin_ocn                                                         | Kalman: Integrated Rand Walk (on GMST alone, GMST & GSST)                                                                         | Visser 2018                                           | \$(Fig 14) | 4.3/5_Kalman    |
| removeMEI_cons                                                                         | Remove MEI                                                                                                                        | Foster and Rahmstorf 2011                             | \$(Fig 14) | 4.3/6_Remove_IV |
| removeMEI_volc_cons<br>removeMEI_volc_refit                                            | Remove MEI, volcanic AOD, solar. Cons (constant) or refit refers to                                                               | Foster and Rahmstorf 2011                             |            | 4.3/6_Remove_IV |



|                                                  |                                                                                                                                                                                                                                                                                |                                                                            |            |                         |
|--------------------------------------------------|--------------------------------------------------------------------------------------------------------------------------------------------------------------------------------------------------------------------------------------------------------------------------------|----------------------------------------------------------------------------|------------|-------------------------|
|                                                  | whether the coefficients of each of these linearized components are recalculated at each timestep or held constant to the values provided in the paper.                                                                                                                        |                                                                            |            |                         |
|                                                  | Atlantic and Pacific modes of variability                                                                                                                                                                                                                                      | Wu et al. 2019                                                             | none       | 4.3/6_Remove_IV         |
| lfca_SST<br>lfca_hadcrut                         | Low-frequency component analysis (LFCA) is a method that transforms the leading empirical orthogonal functions (EOFs). Analyze either SST or HadCRUT.                                                                                                                          | Wills et al. 2018;<br>Wills et al. 2020                                    |            | 4.3/6_Remove_IV         |
|                                                  | Spatial EOFs of TS                                                                                                                                                                                                                                                             | Chen and Tung, 2018                                                        | none       | 4.3/6_Remove_IV         |
|                                                  | Reg. Linear Models of Sea level pressure                                                                                                                                                                                                                                       | Sippel et al. 2019                                                         | none       | 4.3/6_Remove_IV         |
| removeGreensfx                                   | Greens Functions on TS                                                                                                                                                                                                                                                         | Samset et al. 2023. Thanks to Bjørn Samset for running these computations. |            | 4.3/6_Remove_IV         |
| CGWL10y_pUKCP<br>CGWL10y_sUKCP<br>CGWL10y_sfUKCP | UKCIP18 RCP4.5 CGWL. "p" refers to the entire ensemble probabilistic prediction, "s" refers to subsampling this ensemble to match those closest to last year's temperature, and "sf" refers to subsampling to match both last year's temperature and the past decadal average. | Betts et. al. (2023)                                                       | \$(Fig 17) | 4.5_EarthModel_C<br>GWL |
|                                                  | HadGEM3 CGWL                                                                                                                                                                                                                                                                   | Betts et. al. (2023)                                                       | none       | 4.5_EarthModel_C<br>GWL |
| CGWL10y_forec<br>CGWL10y_for_halfU               | WMO Lead Centre for Annual-to-Decadal Climate Prediction (forecast coupled models)<br>5 CGWL. We also halved the uncertainty (halfU) because the ensemble was more dispersed than the error from the 20-year running mean.                                                     | Betts et. al. (2023), also thanks to Leon Hermanson                        | \$(Fig 17) | 4.5_EarthModel_C<br>GWL |

|                                                                                                           |                                                                                                                                                                                                                                                                                                                                                                                                                                                                                        |                                                                                  |                                                  |                         |
|-----------------------------------------------------------------------------------------------------------|----------------------------------------------------------------------------------------------------------------------------------------------------------------------------------------------------------------------------------------------------------------------------------------------------------------------------------------------------------------------------------------------------------------------------------------------------------------------------------------|----------------------------------------------------------------------------------|--------------------------------------------------|-------------------------|
| CGWL_10y_IPCC                                                                                             | IPCC Assessed warming trend. CGWL                                                                                                                                                                                                                                                                                                                                                                                                                                                      |                                                                                  |                                                  | 4.5_EarthModel_C<br>GWL |
| cons_hArrh_CO2forc<br>OLS_refit_CO2forc                                                                   | linear CO2-temperature anomaly<br>analysis: constant coefficients<br>(uncertainty from half Arrhenius's<br>5.5°C/doubling estimate) or OLS re-fit<br>every year                                                                                                                                                                                                                                                                                                                        | Jarvis & Forster 2024                                                            |                                                  | 4.4/1_Linear            |
| FaIR_all<br>FaIR_all_unB<br>FaIR_antho<br>FaIR_antho_unB<br>FaIR_nonat<br>FaIR_nonat_unB<br>FaIR_comb_unB | Effective Radiative Forcings via<br>Finite-amplitude Impulse Response<br>Model: FaIR with pre-calibration.<br>Underlying MCMC on sensitivities<br>and key climate parameters. Output is<br>then produced from forcings (all,<br>nonat) or these are combined together:<br>(anthro = all - nonat, or comb = 2/3 *<br>nonat + 1/3 * all). unB refers to post-<br>hoc removal of both the overall and<br>linear-trending bias due to a<br>probability underflow issue in future<br>tests. | Millar et al., 2017<br>Smith et al., 2017<br>Smith et al., 2024<br>AR6 Chapter 7 | \$(Fig 15)                                       | 4.3/2_ERF_FaIR          |
| EBMKF_ta                                                                                                  | Nonlinear EBM within Kalman Filter<br>(volcanos time-averaged, just<br>literature parameters)                                                                                                                                                                                                                                                                                                                                                                                          | Nicklas et al. (2025)                                                            |                                                  | 4.3/3_Kalman            |
| EBMKF_ta2                                                                                                 | Nonlinear EBM (cloud sensitivity<br>increased) within Kalman Filter                                                                                                                                                                                                                                                                                                                                                                                                                    |                                                                                  |                                                  | 4.3/3_Kalman            |
| EBMKF_ta4                                                                                                 | Nonlinear EBM within Kalman Filter,<br>additional top of atmosphere net<br>radiation and unknown energy flux to<br>compensate for ESM discrepancies                                                                                                                                                                                                                                                                                                                                    |                                                                                  | \$(Fig 15)                                       | 4.3/3_Kalman            |
|                                                                                                           | 3-layer linear heat Kalman Filter                                                                                                                                                                                                                                                                                                                                                                                                                                                      | Cummins (2020)                                                                   | none, but<br>does form<br>a core part<br>of FaIR | 4.3/3_Kalman            |
| GWI_tot<br>GWI_tot_orig<br>GWI_anthro<br>GWI_anthro_orig                                                  | GWI: Attributed global warming using<br>Global Warming Index<br>multifingerprinting method: extracted<br>either the total forced warming signal<br>or the anthropogenic component as a                                                                                                                                                                                                                                                                                                 | Otto et al. 2015, Haustein et al., 2017,<br>Forster et al. 2024                  | \$(Fig 15)                                       | 4.3/4_Human_Ind<br>uced |

|                                                                                                     |                                                                                                                                                                                                                                                                                                                                                                                                                                                                                                                                                                                                                                                                                                                                                                                                                                                                                                                                                                                                                                                                                                |                                                            |                   |                     |
|-----------------------------------------------------------------------------------------------------|------------------------------------------------------------------------------------------------------------------------------------------------------------------------------------------------------------------------------------------------------------------------------------------------------------------------------------------------------------------------------------------------------------------------------------------------------------------------------------------------------------------------------------------------------------------------------------------------------------------------------------------------------------------------------------------------------------------------------------------------------------------------------------------------------------------------------------------------------------------------------------------------------------------------------------------------------------------------------------------------------------------------------------------------------------------------------------------------|------------------------------------------------------------|-------------------|---------------------|
|                                                                                                     | simple timeseries of annual mean values. Tot_orig and anthro_orig are the original computations performed for the Indicators of Global Climate Change (IGCC) 2023.                                                                                                                                                                                                                                                                                                                                                                                                                                                                                                                                                                                                                                                                                                                                                                                                                                                                                                                             |                                                            |                   |                     |
| GWI_tot_AR6<br>GWI_tot_CGWL<br>GWI_tot_SR15<br>GWI_anthro_AR6<br>GWI_anthro_CGWL<br>GWI_anthro_SR15 | GWI: Attributed global warming: annual mean timeseries (see above) combined with additional multi-decadal averaging methods, namely:<br>(i) “AR6”: the formal IPCC AR6 WGI definition for attributed global warming (and its annual updates in the IGCC), which used the GWI as one of three methods. Definition: 10-year lagged average<br>(ii) “SR15”: the formal IPCC SR1.5 definition of the level of global warming (and its annual updates in the IGCC), which specifically used the GWI. Definition: 30-year average of human-induced warming centred by extrapolating the most recent 15 year trend into the future; technically only the “anthro” component is the strict definition used by SR1.5, but the other warming components (e.g. “tot”) are also calculated here in the same way for comparison.<br>(iii) “CGWL”: the 20-year mean centred using the constrained future projections of the GWI timeseries, providing an analogous approach to the Betts et al., CGWL, except for for attributable warming instead of realised warming (as in the Betts et al. 2024 method). | Tristram Walsh, work performed specifically for this paper |                   | 4.3/4_Human_Induced |
| KCC_all<br>KCC_human                                                                                | Kriging for Climate Change (all and human-attributable components, as above)                                                                                                                                                                                                                                                                                                                                                                                                                                                                                                                                                                                                                                                                                                                                                                                                                                                                                                                                                                                                                   | Qasmi and Ribes 2022                                       | obs<br>\$(Fig 15) | 4.3/4_Human_Induced |

|             |                                    |                                                                                                                                                                                                                                                                                                   |                               |                         |
|-------------|------------------------------------|---------------------------------------------------------------------------------------------------------------------------------------------------------------------------------------------------------------------------------------------------------------------------------------------------|-------------------------------|-------------------------|
| eROF_anthro | Regularized Optimal Fingerprinting | Gillett et al. 2021                                                                                                                                                                                                                                                                               | obs,<br>note**,<br>\$(Fig 15) | 4.3/4_Human_Ind<br>uced |
|             | Neural Network (CMIP trained)      | Bone et al., 2023a                                                                                                                                                                                                                                                                                | none                          | Section 7               |
|             | UNet (preprint)                    | Bone et al., 2023b<br><a href="https://essopenarchive.org/users/653004/articles/660203-separation-of-internal-and-forced-variability-of-climate-using-a-u-net">https://essopenarchive.org/users/653004/articles/660203-separation-of-internal-and-forced-variability-of-climate-using-a-u-net</a> | none                          | Section 7               |
|             | Artificial neural networks (ANNs)  | Diffenbaugh & Barnes, 2023                                                                                                                                                                                                                                                                        | none                          | Section 7               |

115 **Table S2. Summary of the methods considered for inclusion throughout Section 4.6. "None" methods in the 4th column were not evaluated in any tests. Note \*\* eROF was technically not a current method since future years contribute to fitted parameters, but could be adapted to a strictly current test. eROF, KCC, and GWI can't be evaluated in future volcano tests since that would require thousands of CMIP simulations.**

**Min month proj modifications:**

120 The approach based on Cannon (2025) extrapolates from the minimum monthly temperature observed within recent 12-month periods to estimate when long-term warming thresholds will be crossed.

The method operates by fitting 15-year linear trends to monthly temperature data, then projecting forward from the coolest month in each trailing year. The projection incorporates three key parameters from Cannon (2025): a 33-month offset representing the typical lag between short-term temperature extremes and long-term threshold crossing, plus uncertainty terms  
125 accounting for the 90% confidence range in this timing (-28 to +76 months) and observational uncertainty in the temperature record itself.

For future climate scenarios using ESM1-2-LR or NorESM models, the code constructs continuous temperature records by concatenating historical simulations with future projections, carefully matching baselines between observed and simulated periods. A critical preprocessing step removes the seasonal cycle from these merged datasets to isolate the underlying warming  
130 trend. The method then tracks a 4-year rolling maximum of annual minimum temperatures, propagating both the central projection and combined uncertainties from trend estimation, timing variability, and measurement error through the calculation.

2.2 Further analysis of historical exceedances (Section 4.6.1)

135 The main paper in Figure 20 illustrated the degree of agreement of candidate methods with a retrospectively calculated 20-  
year average for the exceedance of 1°C warming. Here we repeat the analysis for the exceedance of 0.5°C warming. This  
exceedance occurred around 1985 in HadCRUT5 (Figure S1) and similarly in the mid-1980s to early 1990s across all products  
(not shown). Owing to the presence of the Pinatubo and el Chichon eruptions relatively close to this date in several datasets  
the annual mean temperature exceeds 0.5°C then dips below before exceeding on a more permanent basis. Here we benchmark  
140 against the only time it is exceeded in the 20-year centered mean<sup>1</sup>, which has a sufficiently wide averaging window that it has  
increased monotonically since 1965 (~0.25°C of warming). Several of the methods assessed here that include volcanic  
influences (from Section 4.4) similarly crossed 0.5°C up to three times (not shown), and the 20-year centered mean may fall  
below future thresholds (eg. 1.5°C) if a sufficiently large volcanic eruption occurs (see section 4.6.2).

145 The violin plots in Figure S1 and Figure 20 were created by fitting a cubic spline to the inverse-gaussian of the probability of  
exceedance data. This method is equivalent to adding a pre-function to correct the q-q plot. Once this smooth cubic spline fit  
is found, manipulation such as remapping, plotting, or conversion between the pdf and cumulative distribution function is  
straightforward.

150 Overall results for 0.5°C exceedance are similar to those for 1°C exceedance (Figure S1). Methods that performed particularly  
poorly at 1°C also tend to perform poorly for exceedance of 0.5°C. Notably OLS linear fit, while still constituting a statistical  
'miss', is somewhat closer. This aligns with IPCC AR5 (Hartmann et al., 2013) where the 10-year lagging mean relative to  
1850-1900 and an OLS trend fit from 1880 almost exactly matched for the period ending in 2012.

155 Given this detailed examination of 0.5 and 1°C exceedances, a metric for continued consideration of each method based on  
the RMS error (Table S3) was utilized for simplicity. Examination of this table reveals that essentially the same set of estimates  
would be used if log-likelihood were the deciding metric.

| method_name    | method_class  | RMS     | log-likel | #q<.5 | bias    | cross_yr0.5 | cross_yr1.0 | #yrs |
|----------------|---------------|---------|-----------|-------|---------|-------------|-------------|------|
| FaIR_nonat_unB | 44/2_ERF_FaIR | 0.02475 | 2.313     | 0     | 0.00001 | 1984.9      | 2010.3      | 95   |
| FaIR_nonat     | 44/2_ERF_FaIR | 0.02475 | 2.305     | 0     | 0.00001 | 1984.8      | 2010.2      | 95   |

<sup>1</sup> As the midpoint of a true 20-year centered mean would fall on a half-year time point, we define within this paper a 20-year centered mean to be the average of a 19-year and 21-year centered mean to compare to the variety of other methods which report warming at whole integer years.

|                   |                    |         |        |    |          |        |        |     |
|-------------------|--------------------|---------|--------|----|----------|--------|--------|-----|
| GWl_tot_CGWL      | 44/4_Human_Induced | 0.02632 | 2.222  | 0  | -0.00001 | 1985.6 | 2009.5 | 75  |
| FaIR_comb_unB     | 44/2_ERF_FaIR      | 0.02706 | 2.189  | 2  | -0.00165 | 1985.4 | 2009.3 | 91  |
| FaIR_anthro_unB   | 44/2_ERF_FaIR      | 0.02728 | 2.178  | 9  | 0.00019  | 1983.6 | 2010.5 | 95  |
| EBMKF_ta2         | 44/3_Kalman        | 0.02769 | 2.146  | 0  | 0.00005  | 1984.7 | 2010.3 | 174 |
| FaIR_anthro       | 44/2_ERF_FaIR      | 0.02770 | 2.166  | 0  | -0.00481 | 1983.8 | 2010.7 | 95  |
| EBMKF_ta          | 44/3_Kalman        | 0.02942 | 2.075  | 0  | 0.00694  | 1983.7 | 2009.1 | 174 |
| EBMKF_ta4         | 44/3_Kalman        | 0.03024 | 2.056  | 0  | -0.00793 | 1985.7 | 2010.7 | 174 |
| CGWL10y_for_halfU | 45_EarthModel_CGWL | 0.03330 | 1.988  | 4  | -0.01946 | 1987.4 | 2009.8 | 64  |
| CGWL10y_forec     | 45_EarthModel_CGWL | 0.03330 | 1.957  | 0  | -0.01946 | 1987.5 | 2010.0 | 64  |
| GWl_anthro_AR6    | 44/4_Human_Induced | 0.03417 | 1.956  | 0  | -0.00003 | 1986.2 | 2012.7 | 75  |
| TheilSen_h7075    | 43/2_LT_Fits       | 0.03657 | 2.048  | 0  | 0.00404  | 1980.7 | 2012.4 | 90  |
| hinge75meet       | 43/2_LT_Fits       | 0.03722 | 1.893  | 1  | 0.00492  | 1980.2 | 2010.4 | 90  |
| CGWL10y_pUKCP     | 45_EarthModel_CGWL | 0.03957 | -4.105 | 64 | 0.00785  | 1987.0 | 2009.9 | 165 |
| GWl_anthro_CGWL   | 44/4_Human_Induced | 0.04011 | 1.825  | 8  | 0.00004  | 1983.5 | 2010.9 | 75  |
| GWl_anthro        | 44/4_Human_Induced | 0.04107 | 1.814  | 8  | -0.00001 | 1984.1 | 2011.5 | 75  |
| CGWL10y_sfUKCP    | 45_EarthModel_CGWL | 0.04113 | 1.742  | 7  | 0.00143  | 1985.7 | 2009.6 | 155 |
| CGWL10y_sUKCP     | 45_EarthModel_CGWL | 0.04271 | 1.746  | 4  | 0.00016  | 1985.5 | 2010.1 | 155 |
| OLS_hinge75       | 43/2_LT_Fits       | 0.04302 | 1.982  | 2  | 0.00743  | 1979.5 | 2011.0 | 90  |
| GWl_anthro_SR15   | 44/4_Human_Induced | 0.04318 | 1.745  | 5  | 0.00001  | 1985.5 | 2011.4 | 75  |
| CGWL_10y_IPCC     | 45_EarthModel_CGWL | 0.04380 | 1.677  | 0  | -0.00021 | 1983.2 | 2009.7 | 166 |
| Kal_flexLin_ocn   | 43/5_Kalman        | 0.04424 | 1.687  | 0  | -0.00408 | 1986.9 | 2011.8 | 175 |

|                     |                    |         |       |    |          |        |        |     |
|---------------------|--------------------|---------|-------|----|----------|--------|--------|-----|
| Kal_flexLin         | 43/5_Kalman        | 0.04813 | 1.610 | 0  | -0.00939 | 1986.5 | 2012.8 | 175 |
| removeGreensfx      | 43/6_Remove_IV     | 0.04933 | 1.590 | 0  | -0.00170 | 1980.6 | 2009.9 | 174 |
| Kalman_RW_ocn       | 43/5_Kalman        | 0.04969 | 1.577 | 0  | -0.02171 | 1987.4 | 2014.2 | 175 |
| lowess1dt30wnc      | 43/3_ST_Fits       | 0.05053 | 1.463 | 2  | -0.01072 | 1985.5 | 2012.0 | 172 |
| lowess1dt36wnc      | 43/3_ST_Fits       | 0.05104 | 1.429 | 0  | -0.01319 | 1986.6 | 2011.7 | 172 |
| lowess1dt26wnc      | 43/3_ST_Fits       | 0.05238 | 1.431 | 1  | -0.00924 | 1982.8 | 2012.6 | 172 |
| Kalman_RW           | 43/5_Kalman        | 0.05277 | 1.518 | 0  | -0.02264 | 1987.3 | 2014.5 | 175 |
| removeMEI_volc_cons | 43/6_Remove_IV     | 0.05399 | 1.488 | 0  | -0.01261 | 1980.5 | 2008.7 | 53  |
| butterworth         | 43/2_LT_Fits       | 0.05587 | 1.237 | 3  | -0.03451 | 1982.8 | 2013.8 | 76  |
| etrend30y           | 43/3_ST_Fits       | 0.05589 | 1.438 | 0  | -0.01114 | 1987.5 | 2011.1 | 146 |
| lag5y               | 43/1_Run_Means     | 0.05629 | 1.344 | 0  | -0.01802 | 1982.5 | 2014.9 | 171 |
| lowess1dt20wAR      | 43/3_ST_Fits       | 0.05745 | 1.273 | 2  | -0.00751 | 1982.1 | 2013.9 | 172 |
| lowess1dt20wnc      | 43/3_ST_Fits       | 0.05745 | 1.304 | 2  | -0.00751 | 1982.1 | 2013.9 | 172 |
| GAM_AR1             | 43/4_GAM_AR1       | 0.05810 | 1.241 | 17 | -0.01201 | 1986.4 | 2012.6 | 146 |
| lowess1dt20wARMA    | 43/3_ST_Fits       | 0.05839 | 1.318 | 2  | -0.00408 | 1982.1 | 2013.9 | 150 |
| etrend15y           | 43/3_ST_Fits       | 0.05884 | 1.373 | 2  | -0.00613 | 1982.3 | 2013.0 | 161 |
| GWl_tot_SR15        | 44/4_Human_Induced | 0.05945 | 1.378 | 0  | 0.00005  | 1986.6 | 2006.1 | 75  |
| lag10y              | 43/1_Run_Means     | 0.06087 | 1.223 | 0  | -0.03263 | 1987.6 | 2015.8 | 166 |
| GWl_tot             | 44/4_Human_Induced | 0.06155 | 1.394 | 6  | 0.00002  | 1986.5 | 2009.9 | 75  |
| GWl_tot_AR6         | 44/4_Human_Induced | 0.06183 | 1.345 | 2  | 0.00005  | 1987.0 | 2011.9 | 75  |
| FaIR_all_unB        | 44/2_ERF_FaIR      | 0.06447 | 1.322 | 2  | 0.00006  | 1987.0 | 2006.8 | 95  |

|                   |                    |         |        |    |          |        |        |     |
|-------------------|--------------------|---------|--------|----|----------|--------|--------|-----|
| opt_clim_norm     | 43/3_ST_Fits       | 0.06468 | 0.984  | 12 | -0.02112 | 1980.8 | 2013.9 | 175 |
| etrend30y_3CS     | 43/3_ST_Fits       | 0.06474 | 1.264  | 0  | -0.02047 | 1987.5 | 2015.5 | 146 |
| lowess1dg20wnc    | 43/3_ST_Fits       | 0.06490 | 1.169  | 0  | -0.02386 | 1989.2 | 2012.8 | 172 |
| GAM_AR0           | 43/4_GAM_AR1       | 0.06521 | 1.323  | 12 | -0.00611 | 1982.9 | 2012.9 | 146 |
| FaIR_all          | 44/2_ERF_FaIR      | 0.06814 | 1.271  | 2  | 0.02206  | 1985.7 | 2005.6 | 95  |
| lfca_TAS          | 43/6_Remove_IV     | 0.06831 | 1.266  | 0  | -0.04648 | 1986.6 | 2013.8 | 48  |
| GWl_tot_orig      | 44/4_Human_Induced | 0.06831 | 1.245  | 7  | 0.00001  | 1984.8 | 2008.4 | 74  |
| lowess2dt30wnc    | 43/3_ST_Fits       | 0.06876 | 1.172  | 0  | -0.00479 | 1980.5 | 2014.2 | 172 |
| KCC_human         | 44/4_Human_Induced | 0.07200 | 1.021  | 20 | -0.00002 | 1983.9 | 2009.7 | 124 |
| eROF_tot          | 44/4_Human_Induced | 0.07383 | 1.031  | 39 | -0.00004 | 1987.2 | 2008.0 | 175 |
| lowess1dt10wnc    | 43/3_ST_Fits       | 0.07421 | 0.988  | 0  | -0.00580 | 1980.0 | 2014.0 | 172 |
| lowess2dt20wnc    | 43/3_ST_Fits       | 0.07627 | 1.003  | 1  | -0.00555 | 1980.0 | 2014.1 | 171 |
| Bayes_seq_CP      | 43/2_LT_Fits       | 0.07638 | 1.100  | 0  | -0.03116 | 1989.3 | 2012.7 | 126 |
| eROF_anthro       | 44/4_Human_Induced | 0.07794 | 0.915  | 25 | -0.00004 | 1987.1 | 2008.0 | 175 |
| cubic_spline      | 43/4_GAM_AR1       | 0.07935 | 1.114  | 0  | -0.00466 | 1980.0 | 2015.1 | 145 |
| GWl_anthro_orig   | 44/4_Human_Induced | 0.08049 | 1.119  | 0  | 0.00002  | 1982.4 | 2008.7 | 74  |
| removeMEI_cons    | 43/6_Remove_IV     | 0.08188 | 0.630  | 4  | 0.00524  | 1979.9 | 2008.7 | 152 |
| OLS_refit_CO2forc | 44/1_Linear        | 0.08642 | -3.842 | 59 | -0.01811 | 1985.5 | 2012.2 | 175 |
| offset11y         | 43/1_Run_Means     | 0.09200 | 0.999  | 62 | 0.07450  | 1982.6 | 2009.9 | 165 |
| min_month_proj    | 43/3_ST_Fits       | 0.09458 | 1.026  | 1  | 0.02113  | 1979.7 | 2009.5 | 156 |
| KCC_all           | 44/4_Human_Induced | 0.09746 | 0.968  | 4  | 0.00003  | 1988.0 | 2011.0 | 124 |



|                      |                |         |         |    |          |        |        |     |
|----------------------|----------------|---------|---------|----|----------|--------|--------|-----|
| rawly                | 43/1_Run_Means | 0.09798 | 0.898   | 1  | -0.00538 | 1979.5 | 2009.5 | 175 |
| lfca_SST             | 43/6_Remove_IV | 0.09800 | 0.926   | 0  | -0.05228 | 1989.2 | 2014.7 | 77  |
| quartic              | 43/2_LT_Fits   | 0.09906 | 0.992   | 0  | -0.06507 | 1989.5 | 2009.5 | 75  |
| cons_hArrh_CO2forc   | 44/1_Linear    | 0.10426 | -85.493 | 89 | 0.07524  | 1978.4 | 2009.1 | 175 |
| removeMEI_volc_refit | 43/6_Remove_IV | 0.11195 | 0.804   | 0  | 0.00909  | 1985.5 | 2006.6 | 45  |
| OLS_refit            | 43/2_LT_Fits   | 0.13422 | 0.561   | 0  | -0.03125 | 1989.7 | 2022.5 | 75  |

**Table S3: Detailed results for every method historical comparison to the 20-yr centred running mean within HadCRUT5. Note that the uncertainty has been pre-scaled to optimize the log-likelihood from 1925-2024. This means that the average log-likelihood listed in the 4th column above could be further optimized for the entire window for methods that extend prior to 1925. Given the present pre-scaling, the average log-likelihood is substantially better over the 1925-2024 window (>0.3 change) than over this entire window as listed above for only a few methods: CGWL10y\_pUKCP, OLS\_refit\_CO2forc, cons\_hArrh\_CO2forc. The red shading indicates the methods that do not pass the RMSE threshold condition.**

Crossing Years for 0.5°C Above Preindustrial by Method

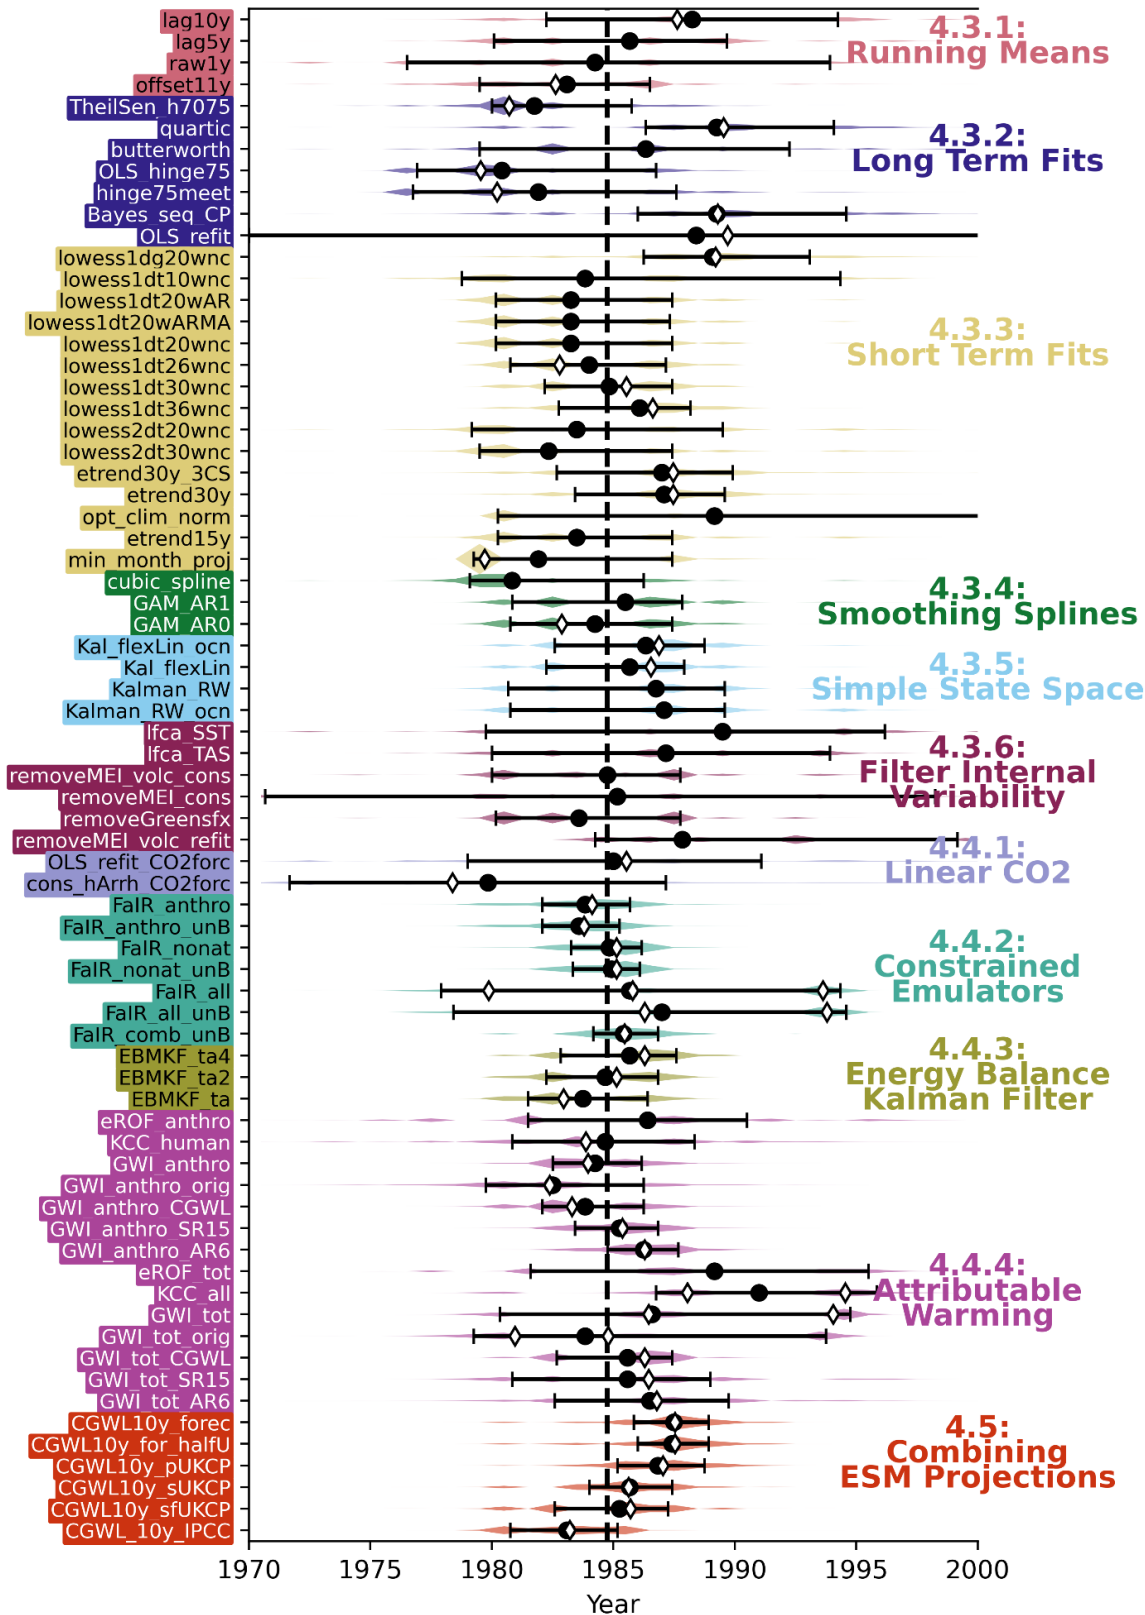

**Figure S1. As in Figure 20 in the main paper, but for exceedance of 0.5°C. See figure caption in main text for further explanations.**

Given that no single approach is likely to be optimal in all circumstances, it is instructive to consider how the entire family of assessed approaches fared in determining the time of exceedance of both 0.5°C and 1°C (Figure S2). In both cases the methods as a whole bracket the actual time of exceedance with a majority of approaches within +/-3 years for 0.5°C and +/-2 years for 1°C. For exceedance of 1°C most methods determine the crossing to have occurred later than the actual retrospective 20-year average occurrence. Ignoring the extreme outlier arising from OLS fit in the mid-2020s for 1°C all methods for both exceedances are within +/-6 years.

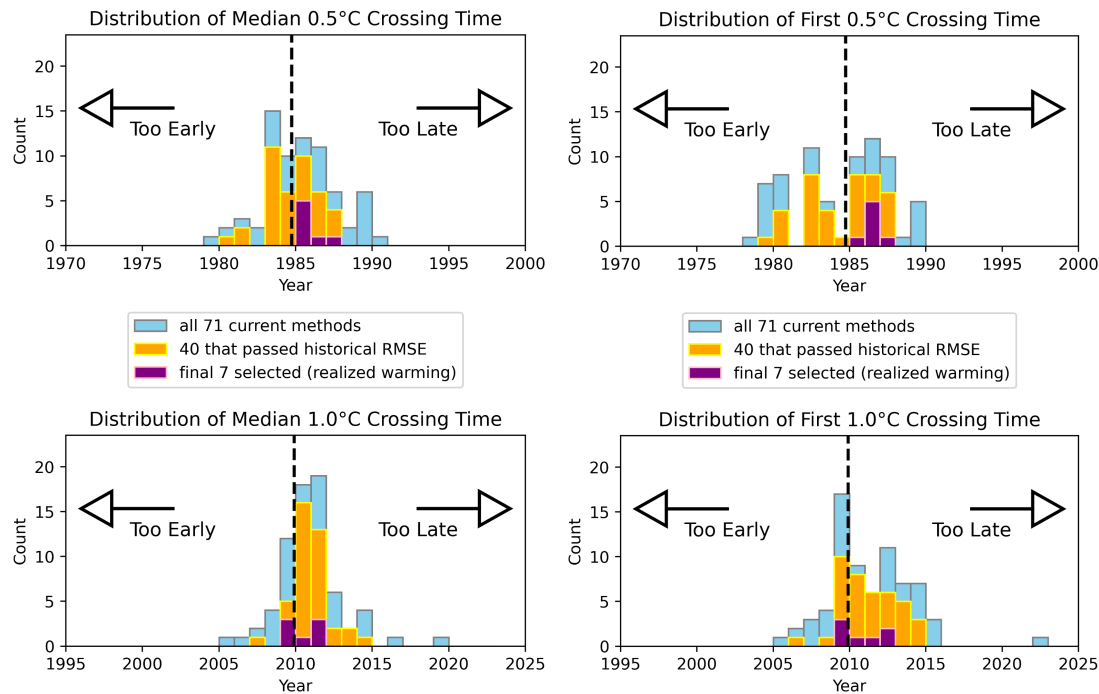

**Figure S2. Overall distribution of the timing of estimates of crossing times relative to the 20-year lagged mean crossing times (shown by a dashed vertical line) in HadCRUT5. Different colours denote retention at different stages of the testing steps outlined in Section 4.6 in the main text.**

## 2.3 Further analysis of possible future behaviour (Section 4.6.2)

### 2.3.1 Selection of methods able to be run against the synthetic test cases

It was not possible (or in some cases, not worthwhile) to modify all techniques to run on the future test cases that rely solely on model simulations and associated forcings. Those methods which were unable to be employed (see Table S2) and the reasons are as follows:

- Ifca\_TAS and Ifca\_SST (4.3.6: Filtering Internal Variability) required significant computational resources to analyze each ensemble member in the 270-member future scenarios suite. We didn't make this investment as this method was very poorly-performing in the historical evaluation (worse than the raw 1-year signal).
- GWI\_tot\_orig and GWI\_tot\_anthro (4.4.6: Human Induced): These were the original outputs from old code as applied to the historical HadCRUT5 (as published in the 2023 IGCC). The code was since updated by Tristram Walsh to perform substantially better, and we did not see the point of running old code on all the future ensemble members.
- eROF\_tot and eROF\_anthro. Had difficulty separating the ROF method from the EsmValTool package, so historical runs are technically not current but retrospective. Furthermore, this method (as applied naively) would require a CMIP ensemble to be run on each of the future volcanic forcings from the NorESM Voc ensemble, much like the hist-volc ensemble runs.
- KCC\_all and KCC\_human: much like ROF, would require a CMIP ensemble to be run on each of the future volcanic forcings from the NorESM Voc ensemble. Was beyond our available resources / time constraints to modify KCC to apply to this test.
- CGWL\_10y\_IPCC: we cannot look into the future and read what future editions of the IPCC will assess. CGWL10y\_forec and CGWL10y\_for\_halfU. It was well beyond our available computational ability to run an ensemble of decadal forecasts initialized to each of the 65 years \* 270 future test ensemble members.

### 2.3.2 Further particulars on the MPI-ESM1.2 LR SMILE ensemble

The MPI\_ESM1.2 model version is described in Mauritsen et al. (2019) and references therein. The SMILE ensemble of MPI\_ESM1.2 LR is run in the low resolution (LR) configuration (1.8° atmosphere, 1.5° ocean) and consists of 50 ensemble members for both historical period and each future core SSP scenario. Future scenario members are initialised from the end of the historical forcing runs at the end of 2014. Each future scenario is the standard SSP scenario configuration as deployed in the DECK scenario runs using this model. Further details on the configuration are given in Olonscheck et al. (2023). Figure S3 illustrates how the different ensembles in the MPI-ESM1.2 LR simulations are exhibiting divergent behaviour at the timing of exceeding 1.5°C of warming. Note that crossing times for 1.5°C are systematically somewhat later than in the IPCC AR6 assessment which assessed 1.5°C crossing to occur by the early 2030s for all scenarios, but for the purposes of method performance assessment this is not material per se for the question posed in the present paper. What matters for the present paper is the divergent trajectories around the timing of exceedance.

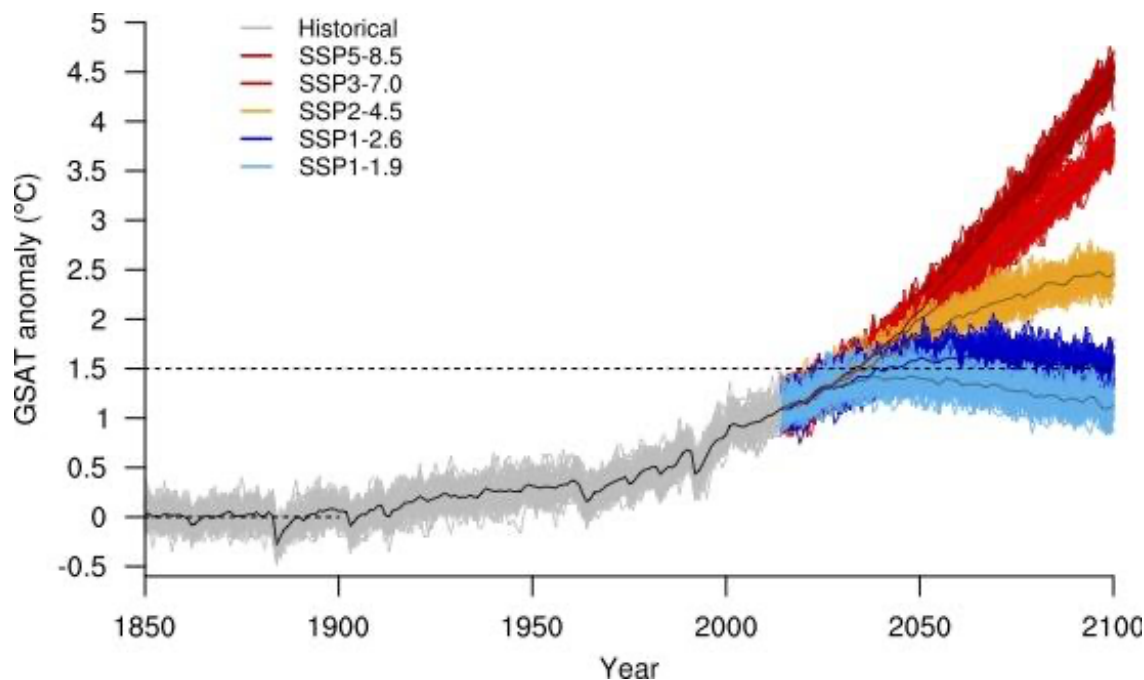

Figure S3. The MPI-ESM1.2-LR 50-member SMILE ensemble results for historical and the standard CMIP6 five future SSP scenarios run to 2100. SSP1-1.9 in the ensemble mean never reaches 1.5°C on a sustained basis. For SSP1-2.6 the ensemble mean exceeds and then returns towards 1.5°C by the end of the 21st Century. All remaining scenarios exceed 1.5°C by a substantial margin and are still warming by the end of the century. The switch to scenarios occurs in 2015 with the cessation of the historical forcings from CMIP.

### 2.3.3 Complete results for the MPI-ESM1.2 LR and NorESM1 Volc Tests

[https://github.com/jnickla1/Thorne\\_15/blob/main/averaged\\_runsNorESM\\_copy.xlsx](https://github.com/jnickla1/Thorne_15/blob/main/averaged_runsNorESM_copy.xlsx)

[https://github.com/jnickla1/Thorne\\_15/blob/main/averaged\\_runsMPIESM\\_copy.xlsx](https://github.com/jnickla1/Thorne_15/blob/main/averaged_runsMPIESM_copy.xlsx)

We direct the readers to these two files, which also contain additional metrics as columns beyond Tables 3 and 4. These are detailed below. Note that additional columns "D-I" without headers in the average\_runs245 tab in averaged\_runsMPIESM\_copy.xlsx were used to create and format Table 3 - they copy the 75RMS columns from other sheets. Highlighting within averaged\_runsNorESM\_copy.xlsx serves this same purpose. All metrics besides RMSEs were combined across all ensemble members with a simple average, whereas RMSEs were combined as mean squared errors before reapplying the square root.

100bias: bias evaluated relative to the 20-year running mean over both 2000-2090

bias50: bias evaluated over a shorter period 2050-2090.

bias: bias evaluated over a longer period 1850-2090.

#q<0.1: average # of q-values from 1850-2090 that are smaller than 0.1 (detectable difference from 20-year running mean)

#q<0.5: average # of q-values from 1850-2090 that are smaller than 0.5

100log-l: sum of log-likelihoods relative to 20-year running mean from 2000-2090

Edyrs15: most extreme difference in 1.5°C crossing time (in years) relative to the 20-year running mean (if there are multiple  
240 crossing times).

Fdyrs15: difference in the first 1.5°C crossing time relative to the 20-year running mean

Mdyrs15: median difference in the first 1.5°C crossing time relative to the 20-year running mean (computed from the equilibrium point of the PDF curves)

""dyrs20: same as above but for 2.0°C crossing times, defaults to -1 if the 20-year running mean never crosses.

245 EdyrsA: same as above but averaging all crossing times from 1.1°C up to the maximum reached by the 20-year running mean

RMSyrsA: RMSE evaluated over a longer period 1850-2090 relative to the 20-year running mean

100RMS: RMSE evaluated over 2000-2090 relative to the 20-year running mean

75RMS: RMSE evaluated over 2025-2090 relative to the 20-year running mean (used in main text tables)

l15: log-likelihood of 1.5°C in the year the 20-year running mean crosses 1.5°C

250 l20: log-likelihood of 2.0°C in the year the 20-year running mean crosses 2.0°C

log-likeli: average log-likelihood of the 20-year running mean over entire 1850-2090 period

ncEdyrs: number of times that a 0.1°C threshold is crossed from 1.1°C to the end of the record by that metric (up to the max temperature achieved by the 20-year running mean). So if the 20-year running mean reaches 1.65°C and the method is linear, it will have exactly 6 crossings.

255 nceEdyrs: Same as the above, but counting up to the maximum temperature reached by the ensemble average 20-year running mean (same evaluation for all ensemble members).

q\_min: the minimum q-value, corresponds to the certainty we can detect one year differs from the 20-year mean

q\_small5: : the 5th smallest q-value, corresponds to the certainty we can detect that a set of 5 years differ from the 20-year mean

260 smooth\_r: the ratio of the unsmoothness of a particular method (entire 1850-20100 window) compared to the 20-year running mean unsmoothness (1860-2090). We define unsmoothness as the mean absolute 2nd differences (2nd derivative) in the central estimate. All straight lines have 0 unsmoothness.

tlog-l: the sum of the log-likelihoods of the 20-year running mean from 1860-2090. Methods that don't report anything for certain years generally are penalized by this metric compared to the average log-likelihood, as most methods have positive  
265 log-likelihood in most years.

e""": any of the above metrics but evaluated relative to the ensemble average 20-year running mean (rather than a within-member comparison).

270 **2.3.4 Further sensitivity analysis results for the combination of different methods to estimate current long-term warming**

Table S4 provides a more comprehensive overview of various sensitivity tests for the combination of various candidate techniques to estimate the present longterm warming level as described in Section 4.6.3 in the main text. Results are found to be relatively insensitive to a range of reasonable choices.

275

|                                | First crossing instant of<br>1.5°C    |              |             | Kullback-Liebler<br>Divergence |           | # crosses | RMSE      |           |
|--------------------------------|---------------------------------------|--------------|-------------|--------------------------------|-----------|-----------|-----------|-----------|
|                                | within 1 yr                           | within 2 yrs | within 5yrs | 2000-2090                      | 2025-2090 | of 1.5°C  | 2000-2090 | 2025-2090 |
| Ensemble                       | Compressed Mixture (CSCM), 7 methods  |              |             |                                |           |           |           |           |
| ESM1-2-<br>LR_SSP370_constVolc | 54.6%                                 | 85.0%        | 100.0%      | 0.352                          | 0.271     | 1.080     | 0.0368    | 0.0335    |
| ESM1-2-<br>LR_SSP245_constVolc | 55.7%                                 | 85.1%        | 99.2%       | 0.488                          | 0.481     | 1.040     | 0.0322    | 0.0301    |
| ESM1-2-<br>LR_SSP126_constVolc | 20.8%                                 | 39.3%        | 75.5%       | 0.568                          | 0.602     | 1.460     | 0.0356    | 0.0348    |
| NorESM_RCP45_VolcCon<br>st     | 53.3%                                 | 87.1%        | 100.0%      | 0.591                          | 0.623     | 1.017     | 0.0300    | 0.0300    |
| NorESM_RCP45_Volc              | 29.6%                                 | 54.3%        | 87.9%       | 0.711                          | 0.771     | 1.100     | 0.0495    | 0.0510    |
|                                | Compressed Mixture (CSCM), 18 methods |              |             |                                |           |           |           |           |
| ESM1-2-<br>LR_SSP370_constVolc | 55.7%                                 | 85.1%        | 100.0%      | 0.345                          | 0.269     | 1.060     | 0.0365    | 0.0332    |
| ESM1-2-<br>LR_SSP245_constVolc | 55.3%                                 | 83.5%        | 99.1%       | 0.474                          | 0.465     | 1.080     | 0.0322    | 0.0300    |
| ESM1-2-<br>LR_SSP126_constVolc | 20.6%                                 | 39.1%        | 76.0%       | 0.555                          | 0.589     | 1.320     | 0.0354    | 0.0345    |

|                      |       |       |        |       |       |       |        |        |
|----------------------|-------|-------|--------|-------|-------|-------|--------|--------|
| NorESM_RCP45_VolcCon |       |       |        |       |       |       |        |        |
| st                   | 53.5% | 86.7% | 100.0% | 0.568 | 0.475 | 1.017 | 0.0297 | 0.0295 |
| NorESM_RCP45_Volc    | 30.1% | 55.2% | 88.5%  | 0.721 | 0.710 | 1.100 | 0.0492 | 0.0508 |

Compressed Mixture (CSCM), 37  
methods

|                      |       |       |        |       |       |       |        |        |
|----------------------|-------|-------|--------|-------|-------|-------|--------|--------|
| ESM1-2-              |       |       |        |       |       |       |        |        |
| LR_SSP370_constVolc  | 54.4% | 84.6% | 100.0% | 0.356 | 0.272 | 1.060 | 0.0370 | 0.0335 |
| ESM1-2-              |       |       |        |       |       |       |        |        |
| LR_SSP245_constVolc  | 53.8% | 83.0% | 99.3%  | 0.473 | 0.466 | 1.060 | 0.0319 | 0.0299 |
| ESM1-2-              |       |       |        |       |       |       |        |        |
| LR_SSP126_constVolc  | 21.8% | 41.5% | 79.4%  | 0.554 | 0.589 | 1.320 | 0.0348 | 0.0341 |
| NorESM_RCP45_VolcCon |       |       |        |       |       |       |        |        |
| st                   | 54.5% | 86.9% | 100.0% | 0.572 | 0.598 | 1.017 | 0.0294 | 0.0293 |
| NorESM_RCP45_Volc    | 32.6% | 59.1% | 90.9%  | 0.736 | 0.814 | 1.083 | 0.0490 | 0.0507 |

Inverse Variance (PIVW), 7 methods

|                      |       |       |        |       |       |       |        |        |
|----------------------|-------|-------|--------|-------|-------|-------|--------|--------|
| ESM1-2-              |       |       |        |       |       |       |        |        |
| LR_SSP126_constVolc  | 21.1% | 39.9% | 74.6%  | 0.529 | 0.578 | 1.420 | 0.0381 | 0.0383 |
| ESM1-2-              |       |       |        |       |       |       |        |        |
| LR_SSP245_constVolc  | 51.3% | 80.8% | 98.6%  | 0.404 | 0.409 | 1.040 | 0.0357 | 0.0350 |
| ESM1-2-              |       |       |        |       |       |       |        |        |
| LR_SSP370_constVolc  | 56.3% | 85.9% | 100.0% | 0.281 | 0.215 | 1.120 | 0.0351 | 0.0319 |
| NorESM_RCP45_Volc    | 30.8% | 56.1% | 88.3%  | 0.688 | 0.736 | 1.117 | 0.0527 | 0.0545 |
| NorESM_RCP45_VolcCon |       |       |        |       |       |       |        |        |
| st                   | 54.5% | 87.5% | 100.0% | 0.437 | 0.468 | 1.000 | 0.0306 | 0.0310 |

Inverse Variance (PIVW), 18 methods



|                                     |       |       |        |       |       |       |        |        |
|-------------------------------------|-------|-------|--------|-------|-------|-------|--------|--------|
| ESM1-2-                             |       |       |        |       |       |       |        |        |
| LR_SSP126_constVolc                 | 21.9% | 41.4% | 77.9%  | 0.487 | 0.514 | 1.320 | 0.0351 | 0.0336 |
| ESM1-2-                             |       |       |        |       |       |       |        |        |
| LR_SSP245_constVolc                 | 50.2% | 80.1% | 98.2%  | 0.378 | 0.361 | 1.040 | 0.0338 | 0.0311 |
| ESM1-2-                             |       |       |        |       |       |       |        |        |
| LR_SSP370_constVolc                 | 53.5% | 84.8% | 100.0% | 0.301 | 0.206 | 1.040 | 0.0365 | 0.0309 |
| NorESM_RCP45_Volc                   | 31.1% | 56.6% | 88.3%  | 0.673 | 0.712 | 1.100 | 0.0515 | 0.0528 |
| NorESM_RCP45_VolcCon                |       |       |        |       |       |       |        |        |
| st                                  | 54.8% | 87.6% | 100.0% | 0.424 | 0.446 | 1.000 | 0.0298 | 0.0295 |
| Inverse Variance (PIVW), 37 methods |       |       |        |       |       |       |        |        |
| ESM1-2-                             |       |       |        |       |       |       |        |        |
| LR_SSP126_constVolc                 | 23.3% | 43.8% | 79.7%  | 0.491 | 0.535 | 1.420 | 0.0355 | 0.0354 |
| ESM1-2-                             |       |       |        |       |       |       |        |        |
| LR_SSP245_constVolc                 | 53.1% | 82.5% | 99.0%  | 0.358 | 0.353 | 1.040 | 0.0322 | 0.0306 |
| ESM1-2-                             |       |       |        |       |       |       |        |        |
| LR_SSP370_constVolc                 | 57.1% | 86.9% | 100.0% | 0.294 | 0.238 | 1.060 | 0.0359 | 0.0335 |
| NorESM_RCP45_Volc                   | 30.7% | 56.1% | 88.5%  | 0.675 | 0.709 | 1.150 | 0.0515 | 0.0525 |
| NorESM_RCP45_VolcCon                |       |       |        |       |       |       |        |        |
| st                                  | 56.1% | 88.2% | 100.0% | 0.419 | 0.437 | 1.017 | 0.0295 | 0.0288 |

**Table S4: As in Table 5, but with more options for the number of methods included.**

## 2.4 Description of generation of additional forcing and ocean temperature data (Sections 4.6 and 5)

280 For external forcing estimates (relevant for the FaIR and EBM-KF methods), we used a random 100 member subset (using  
simple rather than balanced k-means sampling) of the 841 ensemble members of net top-of-atmosphere forcing estimates from  
Smith *et al.* (2024). FaIR internally does a thorough job of assimilating the uncertainty in this external forcing ensemble  
(especially anthropogenic forcings), so we leave the ensemble as it is calibrated. While future expansion / modification of this  
code is possible, the EBM-KF-ta4 method currently designates anthropogenic and natural forcings as known inputs to an  
285 uncertain model, whereas the net top-of-atmosphere forcing is an uncertain observation.

For ocean heat content estimates (relevant only for the EBM-KF-ta4 method), we generated 100 ensemble member time series (Figure S4) to represent its structural uncertainty using 5 instrumental ocean heat content datasets (IAPv4, Cheng *et al.*, 2024; CSIRO, Domingues *et al.*, 2008; EN4, Good *et al.*, 2013; JMA, Ishii *et al.*, 2017; NCEI, Levitus *et al.*, 2012), 1 community consensus estimate constructed from these 5 instrumental datasets (GCOS, von Shuckmann *et al.*, 2024), and 7 reanalysis datasets (CORA, Szekely *et al.*, 2019; MoHEACAN, Marti *et al.*, 2023; Minière *et al.*, 2023; the four GREP reanalyses, Cocetta *et al.*, 2024). Because these datasets do not have perfect coverage, we infilled data gaps by considering three different depth layers (0-700m, 700-2000m, 2000m-6000m) and different regions (e.g., latitudinal bands). For each year, ensemble member, depth range, and region, a selection is made among the available datasets, ensuring that each available dataset is sampled a proportionate number of times (details are provided in the zenodo dataset description); although, we considered the four variants of EN4 as a single dataset and the four GREP reanalyses as a single dataset for this sampling. We used Zanna *et al.* 2024 estimates when no other ocean heat content estimates were available, but otherwise avoided using these estimates since these estimates were inferred from sea surface temperature observations, so these estimates have modeled unconstrained transport biases and their inclusion could result in double counting of SST information. To extend Zanna *et al.* estimates prior to 1870, we assumed deterministic conditions were the same as in 1870, but with added AR1 noise. For each ensemble member, an associated non-structural uncertainty time series was estimated and treated as temporally uncorrelated between years.

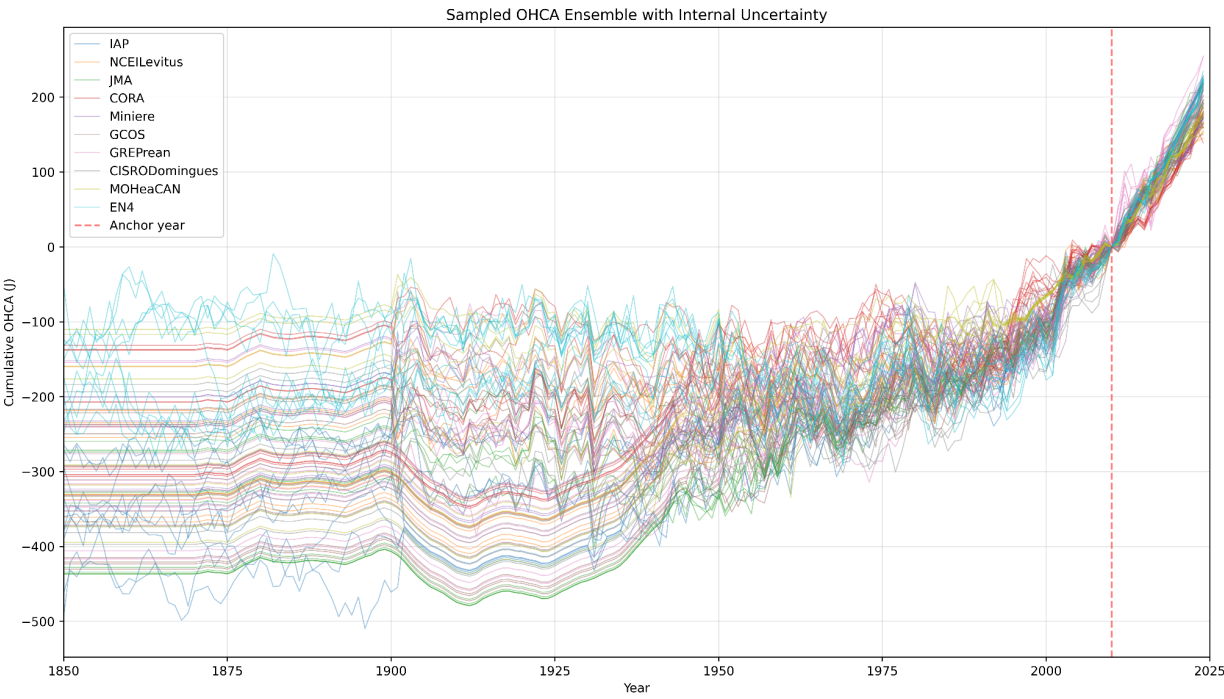

**Figure S4. Annual OHCA (all-latitudes, all-depths) as a 100-member ensemble, constructed by a similar family tree method to the preceding figure for global mean temperature anomalies. In this case, the family tree draws available data region-by-region from the available reconstruction, reanalysis, and observational datasets (Supplemental Table S5). Additionally, AR1 process noise is**

added to provide consistency of each ensemble member as a draw from the internal dataset uncertainty when the ensemble spread would underestimate the uncertainty. The Zanna et al. 2024 reconstruction is not used during the ARGO era, but from 1870-1900 it is the only product available. Before 1870, no net change in OHCA is assumed, but AR1 noise is used to broaden the ensemble spread consistent with the first uncertainty value from Zanna et al.

Next, for each of the 7 realized and 2 attributable methods of Section 4, we estimate realized and anthropogenic warming 100 times, once with each of the ensemble member time series of temperature anomalies, and for EMB-KF-ta4 also 100 sampled members of radiative forcing, ocean heat content, and ocean heat content non-structural uncertainty. When applying these Section 4 methods, we assume no time-varying, measurement-related uncertainty for each ensemble member time series of temperature anomalies and radiative forcing, which avoids a double counting of observational uncertainty. However, the bulk of the total uncertainty reported by each of these methods is intrinsic to each method and unrelated to the observational uncertainty. These intrinsic uncertainties generally arise from: the mechanics of nearest-neighbor sampling within a finite ensemble (FaIR, CGWL\_10y\_sfUKCP), solving for coefficients within an over-specified linear system (lowess, GWI), or core dynamical parameters of a Bayesian system (EBMKF).

| Name                          | Citation                                                                                                                       | 0-700m<br>START | 0-700m<br>END | 0-2000m<br>START | 0-2000m<br>END | 0-6000m<br>START | 0-6000m<br>END | Regional<br>Coverage |
|-------------------------------|--------------------------------------------------------------------------------------------------------------------------------|-----------------|---------------|------------------|----------------|------------------|----------------|----------------------|
| IAP                           | Cheng et al., 2024                                                                                                             |                 |               | 1940             | 2024           | 1992             | 2024           | global               |
| NCEI/Levitus                  | Levitus et al., 2012                                                                                                           | 1955            | 2024          | 2005             | 2024           |                  |                | global               |
| CORA                          | Szekely et al., 2019                                                                                                           |                 |               |                  |                | 1960             | 2024           | global<br>(gridded)  |
| EN4.2.2.c14,<br>c13, g10, l09 | Levitus et al., 2009;<br>Gouretski & Reseghetti,<br>2010;Cowley et al., 2013;<br>Cheng et al., 2014 bias<br>correction for c14 |                 |               |                  |                | 1900             | 2025           | global<br>(gridded)  |
| Minière                       | Minière et al., 2023                                                                                                           |                 |               |                  |                | 1960             | 2023           | global               |
| GCOS                          | von Schuckmann et al.,<br>2023                                                                                                 |                 |               |                  |                | 1960             | 2020           | 60N to 60S           |

|                     |                        |      |      |      |      |            |        |
|---------------------|------------------------|------|------|------|------|------------|--------|
| GREP<br>reanalyses  | Cocetta et al., 2024   |      | 2005 | 2019 |      | 60N to 60S |        |
| JMA                 | Ishii et al., 2017     |      | 1955 | 2024 |      | global     |        |
| CSIRO/Domi<br>ngues | Domingues et al., 2008 | 1950 | 2023 |      |      | 60N to 60S |        |
| MOHeaCAN            | Marti et al., 2022     |      |      |      | 1993 | 2021       | global |

325 **Table S5: Details of the different ocean heat content products used to form the ensemble estimates. Note that none of the datasets space the whole historical period. Von Schuckman et al. (2024) and Minière et al. (2023) were valuable resources in identifying these data.**

330 These data products were combined so as each depth range and region was selected from one available dataset to provide complete data coverage. Then additional stochastic AR1 noise was added to the records where the spread from different combinations of products did not exceed the reported uncertainty. In this way the ensemble has at least as much aleatoric uncertainty as each reported record. The sampling from different datasets provides the estimate of the epistemic uncertainty to do with different modeling, reconstruction, and statistical methods—as well as inclusion of different observations—which is usually greater than the aleatoric uncertainty.

335 Systemic error for the EN4 dataset was established by fitting a function from the average pointwise uncertainty and the mean observation weight to the IAP dataset's uncertainty, which was also adjusted on per region. CORA provided measures of uncertainty that we did not find as useful, so the systemic uncertainty for each region and year was simply copied from EN4, the other gridded dataset. Some regions were set to a systemic uncertainty of 0, for instance the 600-2000m layer if the shallower 0-600m layer had more reported uncertainty than the whole 0-2000m chunk.

340 Once these records were downloaded and pre-processed, we constructed a 100-member ensemble of global ocean heat content anomaly (OHCA) timeseries spanning 1850-2024 by systematically combining observational products and their spatial/temporal subsets.

345 Starting from 2010 (the period of maximum observational alignment), we processed each year through three sequential steps: (1) latitude infilling, where records covering only 60°S-60°N were extended to global coverage by adding polar regions from complementary datasets (alternating between CORA and EN4 bias-correction variants); (2) depth infilling, where records covering 0-700m or 0-2000m were extended to full depth (0-6000m) using available deeper observations or the Zanna reconstruction; and (3) temporal infilling, where missing years were populated by cycling through all complete records available for that year. This process swept forward to 2024, then backward to 1850, with the Zanna reconstruction added to

the available pool during the backward sweep. Each ensemble member's provenance was tracked via notation strings recording all component datasets and their spatial domains.

350 We augmented the ensemble by sampling within-record uncertainties using an autoregressive AR(1) process. For each cell, we calculated AR(1) coefficients from detrended 41-year windows, then generated temporally-correlated standard normal deviates that evolved according to these coefficients while maintaining unit variance. These were scaled by reported standard errors (using skewed-normal transformations for asymmetric uncertainties) and added to cumulative OHCA timeseries, yielding 100 physically plausible ocean heat content realizations spanning observational and structural uncertainties.

### 355 **3 Supplementary information for Section 5**

#### Bayesian Interpretation

Our methodology has a Bayesian interpretation, whereby the assignment of probabilities to datasets, ocean heat content datasets, and section 4 methods corresponds to the assignment of hyperpriors to each dataset or section 4 method. Under this interpretation, the probability that exactly one of the GMST/GSAT datasets, exactly one of the ocean heat content datasets, 360 and exactly one of the section 4 methods have the correct statistical models is one, which, while implausible, provides a reasonable framework to account for structural uncertainty. We consider the uncertainty distribution of each dataset as the posterior distribution given observations and conditional on that dataset having the correct statistical model. Some datasets have explicitly Bayesian frameworks (e.g., GETQUOCS), while others have explicitly frequentist frameworks (e.g., HadCRU\_MLE). For frequentist datasets, their frequentist likelihood distributions can be interpreted as approximate Bayesian 365 posterior distributions as their likelihood distributions are approximately multivariate normal and by invoking objective Jeffrey's priors. The application of the section 4 methods can be interpreted as a Bayesian update to account for the information of the section 4 methods and other data sources such as radiative forcing data. Therefore, the results of our study can be interpreted as posterior distributions, and our uncertainty intervals can be considered credible intervals.

#### Limitations of the dataset merging method

370 Annual global time series (for each ensemble member or for a best estimate if no ensemble was available) were used for each dataset, either as provided by the dataset provider or calculated by us from a simple mean of their monthly series or an annual mean of area-weighted averages of available grid cells if only monthly grids were available.

Ideally, each dataset would have a native ensemble that included uncertainties associated with all known sources of error as they pertained to that dataset. Unfortunately, this is not the case. By using perturbations calculated from 375 NOAA GlobalTempv5.0, ERA5, and HadCRUT5 we may have mis-estimated the uncertainty. It's not clear whether it would

be an underestimate or an overestimate. However, using only the best estimates from non-ensemble datasets would have led to a clear underestimate of the uncertainty which is obviously undesirable (see sensitivity tests).

380 By splicing the tail and head time series together using the midpoint of the reference period, our approach effectively treats uncertainties prior to 1996 as uncorrelated with uncertainties after 1995. As a result, our approach might underestimate uncertainty in the long-term change in global temperature since 1850-1900. The linear correlation coefficient in temperature change from 1850-1900 to 2023 is negative (between -0.10 and -0.20) according to the ensemble members of HadCRUT5 Analysis (and related datasets), DCENT\_MLE, and GloSAT.

385 By using a single hierarchical tree, we perhaps give a greater weight to certain commonalities than others. In practice, a more optimal weighting could be found based on the expected covariances between datasets. The covariances would reflect the different weights given to the input datasets and any commonalities between them. This would still require subjective choices to be made and the choices would be more numerous and more difficult. Furthermore, the covariances would likely vary in time which means that no single choice of dataset weighting would be correct for all time steps. Therefore, to keep things practical, the simpler family-tree method was retained.

#### Dataset merging sensitivity tests

390 A number of sensitivity tests were performed to see to what degree a range of reasonable methodological choices might affect the resulting long-term warming estimates, including their uncertainties. In most respects they did not matter greatly with minor differences between reasonable choices. The mean of the ensemble generally changed very little unless obviously poor choices were made (such as deliberately choosing an unbalanced ensemble). The spread of the ensemble varied more.

The choice of family tree was tested by using a range of different trees using different subsets of data as follows (Figure S5):

- 395
1. Grouping by SST dataset (a)
  2. Grouping by LSAT dataset (b)
  3. Grouping by interpolation method (c)
  4. Equal weighting for all datasets (d)
  5. Tree-of-trees method combining the trees 1-3 (not shown)

400

  6. Random tree, with each ensemble member using a randomly generated tree. (not shown)
  7. Deliberately unbalanced tree (e)
  8. As for 1 but with reanalyses grouped with the most similar SST datasets (f)

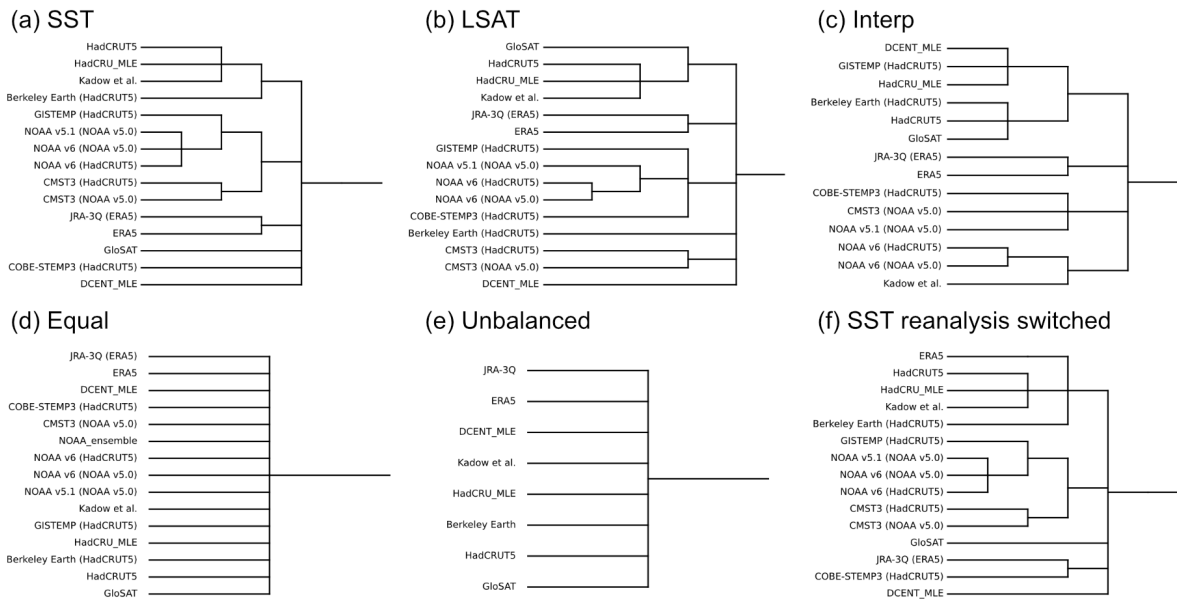

405 **Figure S5. Alternative family tree approaches used to create the large multidataset ensemble. These distinct approaches yield different implicit weightings in ensemble construction to individual underlying products.**

The LSAT grouping (2) generally had the largest ensemble spread (Figure S6), followed by the tree of trees (5) and SST(1) groupings. Equal weighting (4) and interpolation (3) trees gave similar spreads followed by random weighting (6), and finally the unbalanced tree (7) which was dead last (by design).

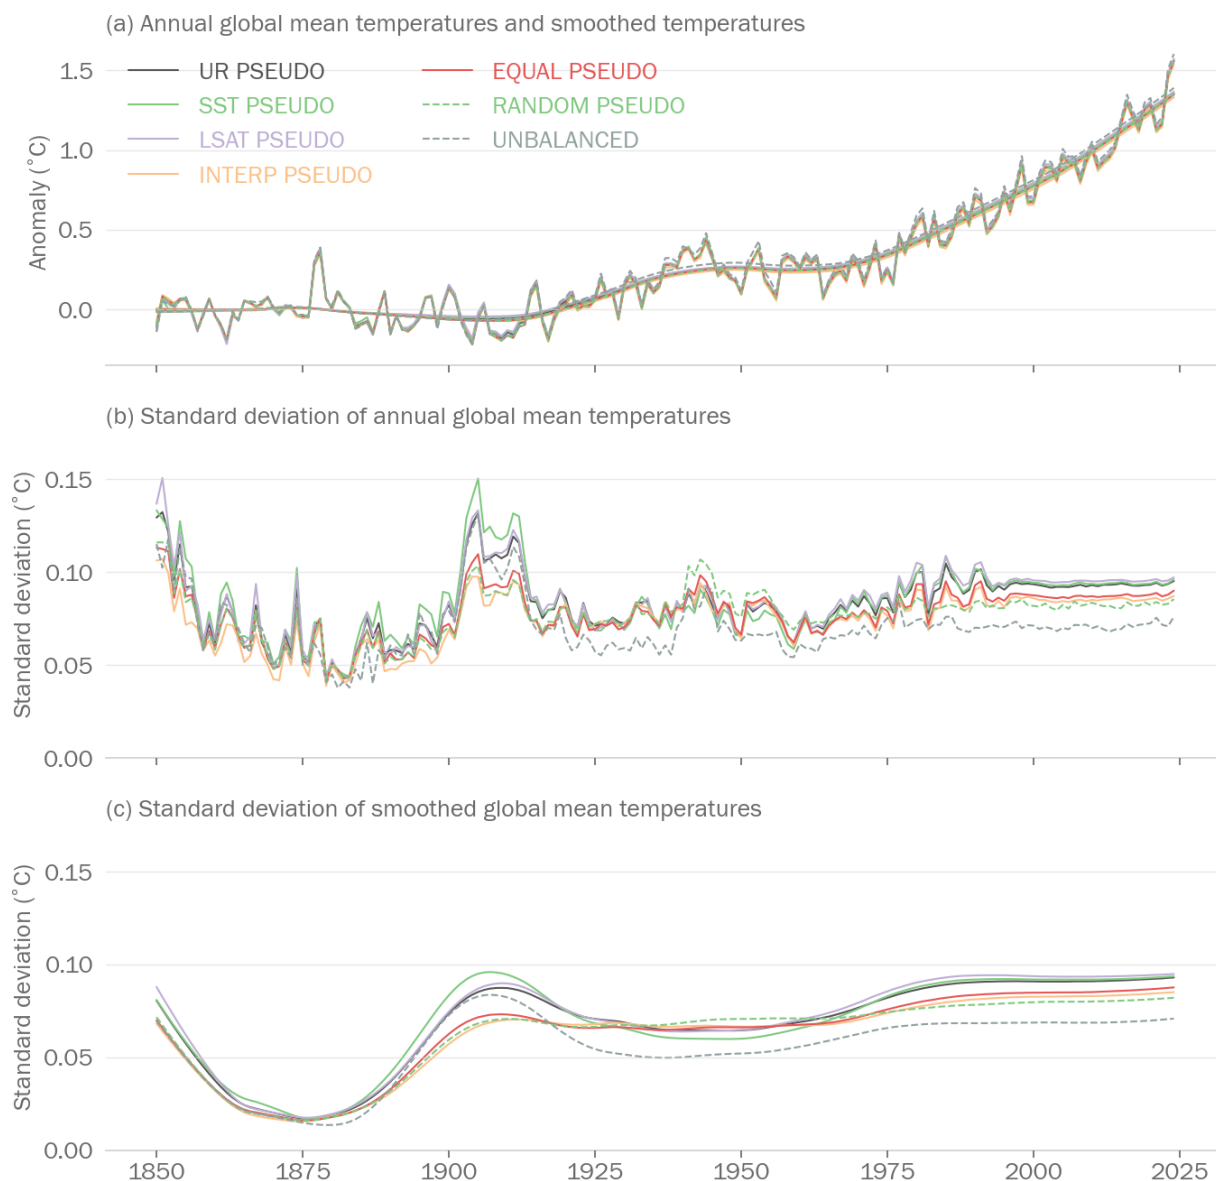

410 **Figure S6: Comparison of the effect of different dataset family trees on (a) the global temperature ensemble mean; (b) the ensemble spread at annual timescales; and (c) the ensemble spread at multi-decadal timescales. The ensemble spread is represented by its standard deviation from its 1850-1900 average.**

In addition, some of these were run in three modes:

- 415 1. Using datasets without modification (mix of ensemble and non-ensemble datasets).



2. Using native ensemble datasets only (hence a reduced set of datasets)
3. Using native ensemble datasets and pseudo ensembles generated for every dataset that did not have one.

Overall, methods which used ensembles (2, 3) typically had larger ensemble spreads (Figure S7) than those that did not (1).

420 Methods using pseudo ensembles (3) had the largest spread after around 1930 and only native ensemble datasets (2) before. Ensemble-only datasets having a wider spread pre-1930 is likely due to large differences between GloSAT and DCENT\_MLE in the early 20<sup>th</sup> Century though all choices have a larger ensemble spread at that time. Method (2) excludes all ERSST-based datasets so it warms more than the other combinations. All versions of NOAAGlobalTemp warm less than the balance of other datasets.

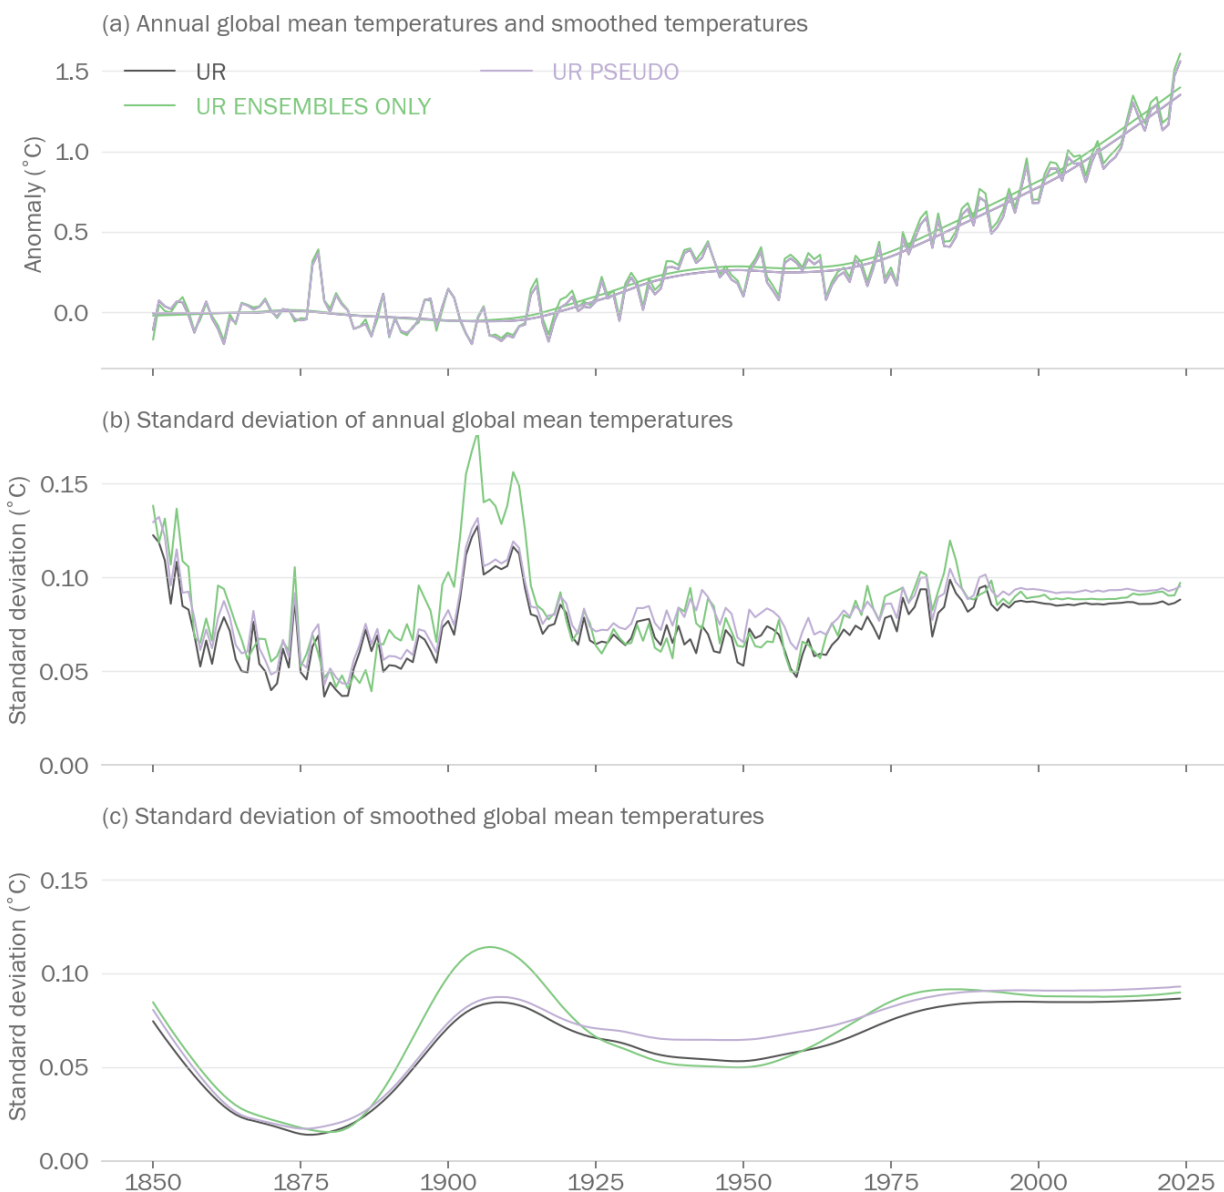

**Figure S7: As Fig. S6, but comparison of non-ensemble, only native ensemble, and pseudo-ensemble datasets.**

The choice to change datasets in the subperiod 1981-2010 was also explored (all overlaps were spliced at the midpoint).

1. 30-year fixed overlap, 1981-2010 (Basic)
2. 30-year overlap, any 30-year period common to the two datasets being spliced, and different each time (Variable overlap)
3. 10-year overlap, any 10-year period common to the two datasets being spliced, and different each time (Short overlap)

4. 2-year overlap, any 2-year period common to the two datasets being spliced, and different each time. (Shortest overlap)

435 The shortest overlap (4) generally had the largest ensemble spread (Figure S8) with longer moving overlaps (2, 3) having progressively smaller ensemble spreads. This is as one might expect as matching on a shorter period will be more affected by noise in single years and this will be averaged out on moving to longer periods. A fixed overlap (1) tends to have a comparable ensemble spread to that with the shortest overlap (4) except between roughly 1925 and 1980 where it is lower than the other methods (2-4).

440

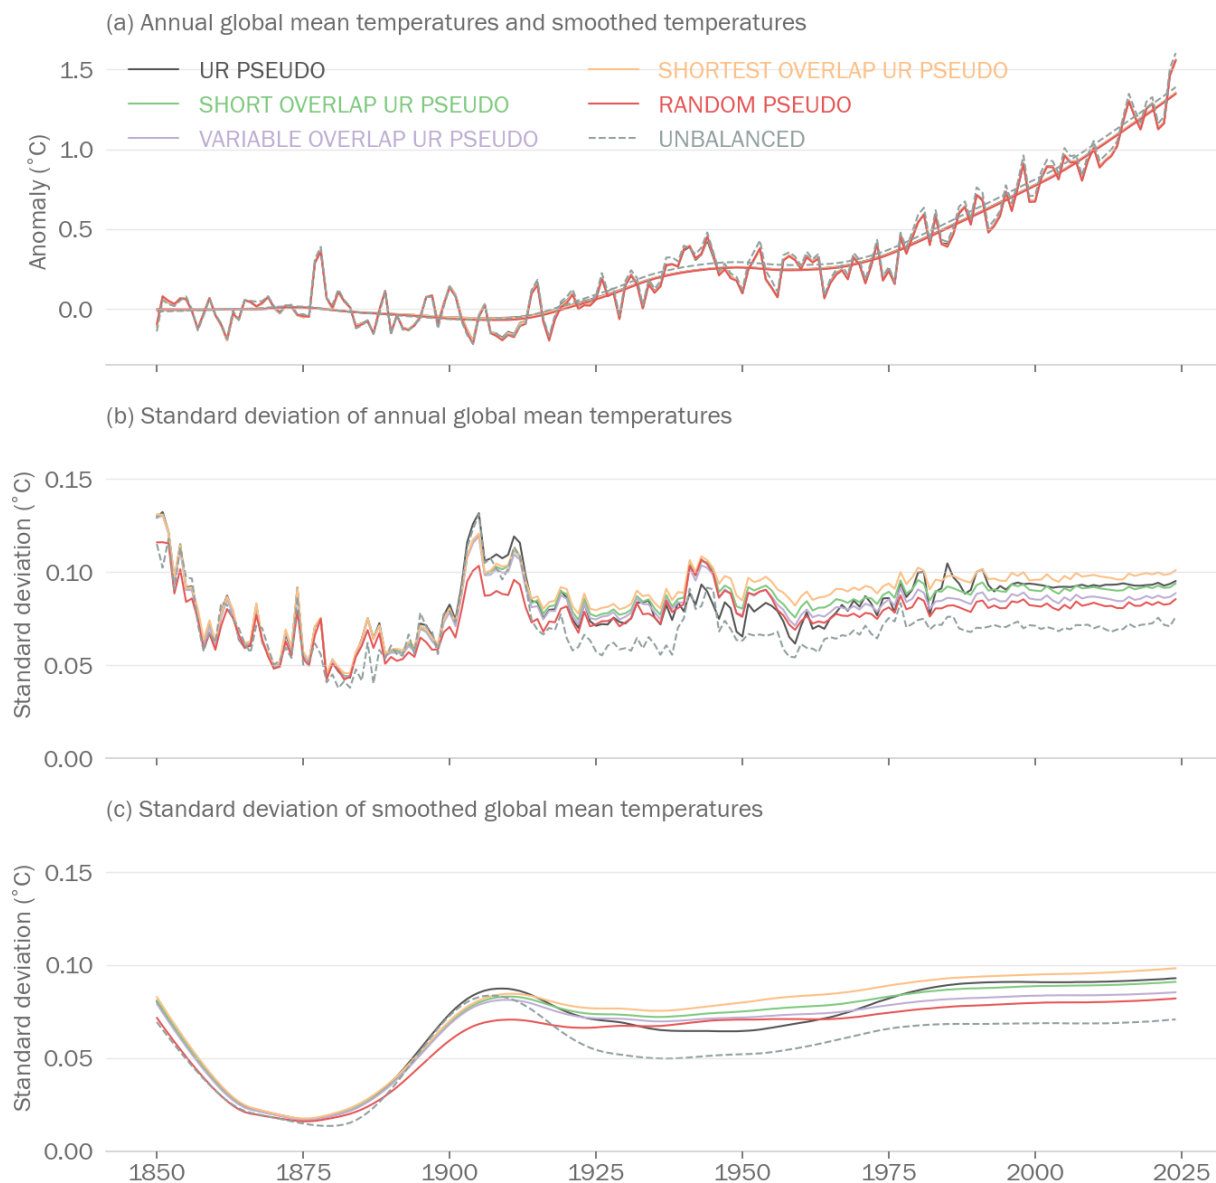

**Figure S8: As Fig. S6, but comparison of different overlap splicing schemes.**

We also compared 5 different methods of generating 100 ensemble members and evaluated their representativeness based on their Fréchet distances to a simple 10,000 member ensemble. In these calculations, we approximated distributions as multivariate normal using their sample means and covariance matrices. This metric considers differences in means, variances, and covariances when evaluating representativeness. We used Fréchet distances (Dowson & Landau, 1982) since many other common metrics used to compare multivariate normal distributions, such as Kullback-Leibler divergence (Kullback & Leibler, 1951), the Bhattacharyya distance (Schweppe, 1967), or the Hellinger distance (Eslinger & Woodward, 1990) would not be

applicable as relevant sample covariance matrices could have zero rank either due to a small number of ensemble members or  
450 due to our splicing of head and tail datasets.

The different methods of generating 100 ensemble members were:

1. simple random sample of 100 ensemble members
2. balanced k-means, in which balanced k-means was used to cluster the 10,000 member ensemble into 100 clusters each with 100 members and then one member from each cluster was selected at random
- 455 3. warming rate clustering, in which the ensemble members were ranked according to their long-term warming (difference between 1850-1900 and 2015-2024), split into 100 equal groups and then a random member of each group was chosen
- 460 4. balanced sampling, where 100 ensemble members were generated in such a way that the number of ensemble members generated from each dataset was representative of the underlying distribution (e.g., for the SST-based tree, an approximately equal number of ensemble members would be generated from each of the 3 HadCRUT5-based datasets)
5. rescaled ensemble, where we rescaled a simple random sample of 100 ensemble members to have the same sample mean and variances as the 10,000 member ensemble

Our results suggest that balanced k-means generated the most representative 100 member ensemble, although the reduction in  
465 the Fréchet distance was minor, perhaps due to the strong dependence on the HadCRUT5 ensemble limiting the effective dimensionality of the generated ensemble. Tests that used greater variation in donor ensemble datasets (not shown) found that balanced k-means, warming rate clustering, and balanced sampling greatly improved representativeness of the generated ensemble and even outperformed the simple random sampling of 1000 ensemble members. Techniques similar to our balanced k-means sampling have been used in diverse fields including chemical spectral data (Daszykowski *et al.*, 2002), cellular RNA  
470 data (Li *et al.*, 2022), and soil data (Robertson & Price, 2024).

The three methods all give similar results to the full ensemble (Figure S9) with the k-means method (2) perhaps coming closest of the three to the full ensemble though all means of reducing the ensemble are, as one might expect, noisier in the annual averages.

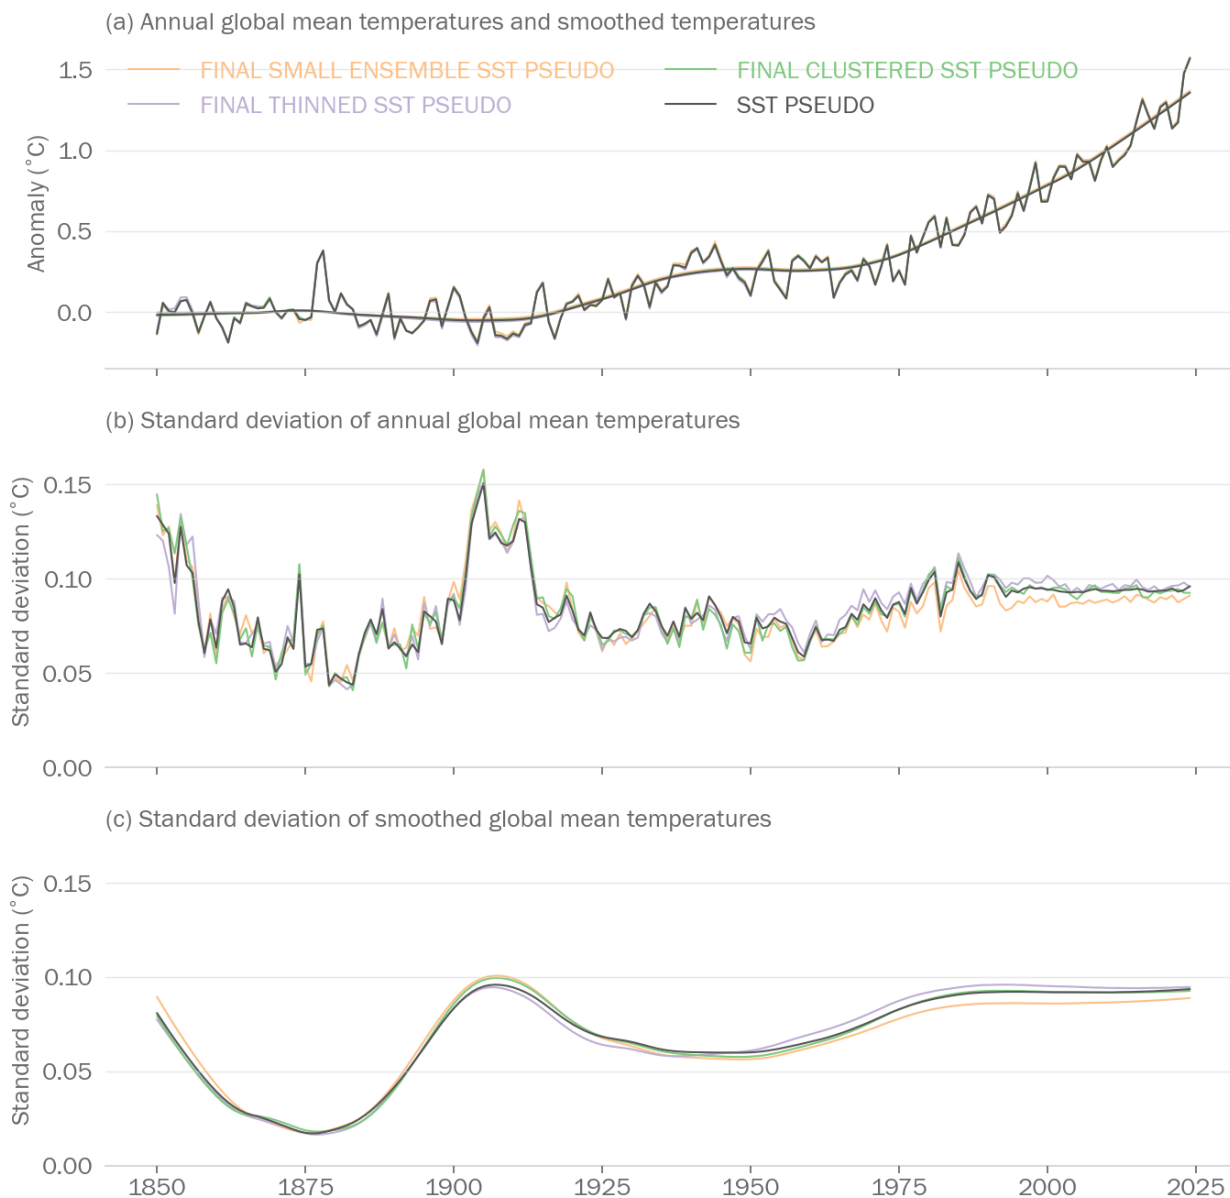

475 **Figure S9: As Fig. S6, but comparison of different schemes for reducing the ensemble size.**

Based on these sensitivity studies, it is suggested to generate:

- a large 10,000 member ensemble: which gives a stable estimate of the ensemble spread
- using a fixed overlap (1981-2010): preferred for operational reasons
- with each dataset converted to an ensemble if it was not already an ensemble: which makes use of the widest range of datasets and associated information
- The 10,000-member ensemble can be reduced to a 100-member ensemble using balanced k-means

## References

- Betts, R. A., et al.: Approaching 1.5 °C: how will we know we've reached this crucial warming mark?, *Nature*, 624, 33–35, <https://doi.org/10.1038/d41586-023-03775-z>, 2023.
- 485 Bevacqua, E., Schleussner, C.-F., and Zscheisler, J.: A year above 1.5 °C signals that Earth is most probably within the 20-year period that will reach the Paris Agreement limit, *Nat. Clim. Change*, <https://doi.org/10.1038/s41558-025-02246-9>, 2025.
- Bône, C., Gastineau, G., Thiria, S., Gallinari, P., and Mejia, C.: Detection and attribution of climate change using a neural network, *J. Adv. Model. Earth Syst.*, 15, e2022MS003475, <https://doi.org/10.1029/2022MS003475>, 2023.
- Cannon, A. J.: Twelve months at 1.5 °C signals earlier than expected breach of Paris Agreement threshold, *Nat. Clim. Change*,  
490 <https://doi.org/10.1038/s41558-025-02247-8>, 2025.
- Chen, X. and Tung, K. K.: Global-mean surface temperature variability: space–time perspective from rotated EOFs, *Clim. Dyn.*, 51, 1719–1732, <https://doi.org/10.1007/s00382-017-3979-0>, 2018.
- Cheng, L., J. Zhu, R. Cowley, T. Boyer, and S. Wijffels: Time, Probe Type, and Temperature Variable Bias Corrections to Historical Expendable Bathythermograph Observations. *J. Atmos. Oceanic Technol.*, 31, 1793–1825,  
495 <https://doi.org/10.1175/JTECH-D-13-00197.1>, 2014
- Clarke, D. C. and Richardson, M.: The benefits of continuous local regression for quantifying global warming, *Earth Space Sci.*, 8, e2020EA001082, <https://doi.org/10.1029/2020EA001082>, 2021.
- Cocetta, F., Zampieri, L., Selivanova, J. & Iovino D.: Assessing the representation of Arctic sea ice and the marginal ice zone in ocean–sea ice reanalyses. *The Cryosphere*, 18(10), 4687–4702. <https://doi.org/10.5194/tc-18-4687-2024>, 2024
- 500 Cowley, R., S. Wijffels, L. Cheng, T. Boyer, and S. Kizu: Biases in Expendable Bathythermograph Data: A New View Based on Historical Side-by-Side Comparisons. *J. Atmos. Oceanic Technol.*, 30, 1195–1225, <https://doi.org/10.1175/JTECH-D-12-00127.1>, 2013
- Cummins, D. P., Stephenson, D. B., and Stott, P. A.: A new energy-balance approach to linear filtering for estimating effective radiative forcing from temperature time series, *Adv. Stat. Clim. Meteorol. Oceanogr.*, 6, 91–102,  
505 <https://doi.org/10.5194/ascmo-6-91-2020>, 2020.
- Daszykowski, M., Walczak, B. & Massart, D.L.: Representative subset selection. *Analytica Chimica Acta*, 468(1), 91–103. [https://doi.org/10.1016/S0003-2670\(02\)00651-7](https://doi.org/10.1016/S0003-2670(02)00651-7), 2002.

- Diffenbaugh, N. S. and Barnes, E. A.: Data-driven predictions of the time remaining until critical global warming thresholds are reached, *Proc. Natl. Acad. Sci. USA*, 120, e2207183120, <https://doi.org/10.1073/pnas.2207183120>, 2023.
- 510 Dowson, D.C. & Landau, B.V. :The Fréchet distance between multivariate normal distributions. *Journal of Multivariate Analysis*, 12(3), 450-455. [https://doi.org/10.1016/0047-259X\(82\)90077-X](https://doi.org/10.1016/0047-259X(82)90077-X), 1982.
- Duan, Y., Kumar, S., and Kinter, J. L.: Evaluation of long-term temperature trend and variability in CMIP6 multimodel ensemble, *Geophys. Res. Lett.*, 48, e2021GL093227, <https://doi.org/10.1029/2021GL093227>, 2021.
- Eslinger, P.W. & Woodward, W.A.:Minimum hellinger distance estimation for normal models. *Journal of Statistical*  
 515 *Computation and Simulation*, 39(1-2), 95-114. <https://doi.org/10.1080/00949659108811342>, 1990.
- Foster, G. and Rahmstorf, S.: Global temperature evolution 1979–2010, *Environ. Res. Lett.*, 6, 044022, <https://doi.org/10.1088/1748-9326/6/4/044022>, 2011.
- Gillett, N. P., et al.: Constraining human contributions to observed warming since the pre-industrial period, *Nat. Clim. Change*, 11, 207–212, <https://doi.org/10.1038/s41558-020-00965-9>, 2021.
- 520 Gouretski, V. and Reseghetti, F.: On depth and temperature biases in bathythermograph data: Development of a new correction scheme based on analysis of a global ocean database. *Deep Sea Research Part I: Oceanographic Research Papers*, 57, 812-833, <https://doi.org/10.1016/j.dsr.2010.03.011>, 2010
- Hartmann, D. L., Klein Tank, A. M. G., Rusticucci, M., Alexander, L. V., Brönnimann, S., Charabi, Y., Dentener, F. J., Dlugokencky, E. J., Easterling, D. R., Kaplan, A., Soden, B. J., Thorne, P. W., Wild, M., and Zhai, P.: Observations:  
 525 Atmosphere and surface, in: *Climate Change 2013: The Physical Science Basis, Contribution of Working Group I to the Fifth Assessment Report of the Intergovernmental Panel on Climate Change*, edited by: Stocker, T. F., Qin, D., Plattner, G.-K., Tignor, M., Allen, S. K., Boschung, J., Nauels, A., Xia, Y., Bex, V., and Midgley, P. M., Cambridge University Press, Cambridge, United Kingdom and New York, NY, USA, 2013.
- Hawkins, E. and Sutton, R.: The potential to narrow uncertainty in regional climate predictions, *Bull. Am. Meteorol. Soc.*, 90,  
 530 1095–1108, <https://doi.org/10.1175/2009BAMS2607.1>, 2009.
- Jarvis, A. and Forster, P. M.: Estimated human-induced warming from a linear temperature and atmospheric CO<sub>2</sub> relationship, *Nat. Geosci.*, 17, 1222–1224, <https://doi.org/10.1038/s41561-024-01580-5>, 2024.
- Kullback, S. & Leibler, R.A. On Information and Sufficiency. *The Annals of Mathematical Statistics*, 22(1), 79-86. <https://www.jstor.org/stable/2236703>, 1951.



- 535 Lei, L., Lan, L.Y.-L., Huang, L., Ye, C., Andrade, J. & Wilson, P.C.: Selecting Representative Samples From Complex Biological Datasets Using K-Medoids Clustering. *Frontiers in Genetics*, 13, 954024. <https://doi.org/10.3389/fgene.2022.954024>, 2022.
- Levitus, S., J. I. Antonov, T. P. Boyer, R. A. Locarnini, H. E. Garcia, and A. V. Mishonov: Global ocean heat content 1955–2008 in light of recently revealed instrumentation problems, *Geophys. Res. Lett.*, 36, L07608, doi:10.1029/2008GL037155, 540 2009.
- Livezey, R. E., Vinnikov, K. Y., Timofeyeva, M. M., Tinker, R., and van den Dool, H. M.: Estimation and extrapolation of climate normals and climatic trends, *J. Appl. Meteor. Climatol.*, 46, 1759–1776, <https://doi.org/10.1175/2007JAMC1666.1>, 2007.
- Mann, M. E.: Smoothing of climate time series revisited, *Geophys. Res. Lett.*, 35, L16708, 545 <https://doi.org/10.1029/2008GL034716>, 2008.
- Marti, F., Blazquez, A., Meyssignac, B., Ablain, M., Barnoud, A., Fraudeau, R., Jugier, R., Chenal, J., Larnicol, G., Pfeffer, J., Restano, M., and Benveniste, J.: Monitoring the ocean heat content change and the Earth energy imbalance from space altimetry and space gravimetry, *Earth Syst. Sci. Data*, 14, 229–249, <https://doi.org/10.5194/essd-14-229-2022>, 2022.
- Mauritsen, T., Bader, J., Becker, T., Behrens, J., Bittner, M., Brokopf, R., et al.: Developments in the MPI-M Earth System 550 Model version 1.2 (MPI-ESM1.2) and its response to increasing CO<sub>2</sub>, *J. Adv. Model. Earth Syst.*, 11, 998–1038, <https://doi.org/10.1029/2018MS001400>, 2019.
- Millar, R. J., Nicholls, Z. R., Friedlingstein, P., and Allen, M. R.: A modified impulse-response representation of the global near-surface air temperature and atmospheric concentration response to carbon dioxide emissions, *Atmos. Chem. Phys.*, 17, 7213–7228, <https://doi.org/10.5194/acp-17-7213-2017>, 2017.
- 555 Minière, A., von Schuckmann, K., Sallée, J.B. and Vogt, L.: Robust acceleration of Earth system heating observed over the past six decades, *Scientific Reports*, 13(1), p.22975, <https://doi.org/10.1038/s41598-023-49353-1>, 2023.
- Nicklas, J.M., Fox-Kemper, B. and Lawrence, C.: Efficient Estimation of Climate State and Its Uncertainty Using Kalman Filtering with Application to Policy Thresholds and Volcanism. *J. Climate*, 38(5):1235--1270. <https://doi.org/10.1175/JCLI-D-23-0580.1>, 2025.

- 560 Olonscheck, D., Suarez-Gutierrez, L., Milinski, S., Beobide-Arsuaga, G., Baehr, J., Fröb, F., et al.: The new Max Planck Institute Grand Ensemble with CMIP6 forcing and high-frequency model output, *J. Adv. Model. Earth Syst.*, 15, e2023MS003790, <https://doi.org/10.1029/2023MS003790>, 2023.
- Otto, F., Frame, D., Otto, A., et al.: Embracing uncertainty in climate change policy, *Nat. Clim. Change*, 5, 917–920, <https://doi.org/10.1038/nclimate2716>, 2015.
- 565 Qasmi, S. and Ribes, A.: Reducing uncertainty in local temperature projections, *Sci. Adv.*, 8, eabo6872, <https://doi.org/10.1126/sciadv.abo6872>, 2022.
- Robertson, B. & Price, C.: One point per cluster spatially balanced sampling. *Computational Statistics & Data Analysis*, 191, 107888. <https://doi.org/10.1016/j.csda.2023.107888>, 2024.
- Samset, B. H., Zhou, C., Fuglestad, J. S., et al.: Steady global surface warming from 1973 to 2022 but increased warming  
570 rate after 1990, *Commun. Earth Environ.*, 4, 400, <https://doi.org/10.1038/s43247-023-01061-4>, 2023.
- Schweppe, F.C.: On the Bhattacharyya distance and the divergence between Gaussian processes. *Information and Control*, 11(4), 373-395. [https://doi.org/10.1016/S0019-9958\(67\)90610-9](https://doi.org/10.1016/S0019-9958(67)90610-9), 1967.
- Shumway, R. H.: Time series analysis and its applications, 4th edn., Springer Texts in Statistics, Springer International Publishing AG, 562 pp., <https://doi.org/10.1007/978-3-319-52452-8>, 2017.
- 575 Sippel, S., Meinshausen, N., Merrifield, A., Lehner, F., Pendergrass, A. G., Fischer, E., and Knutti, R.: Uncovering the forced climate response from a single ensemble member using statistical learning, *J. Clim.*, 32(17), 5677–5699, <https://doi.org/10.1175/JCLI-D-18-0882.1>, 2019.
- Smith, C. J., Forster, P. M., Allen, M., Leach, N., Millar, R. J., Passerello, G. A., and Regayre, L. A.: FAIR v1.3: a simple emissions-based impulse response and carbon cycle model, *Geosci. Model Dev.*, 11, 2273–2297, <https://doi.org/10.5194/gmd-11-2273-2018>, 2018.  
580
- Smith, C., Cummins, D. P., Fredriksen, H.-B., Nicholls, Z., Meinshausen, M., Allen, M., Jenkins, S., Leach, N., Mathison, C., and Partanen, A.-I.: fair-calibrate v1.4.1: calibration, constraining, and validation of the FaIR simple climate model for reliable future climate projections, *Geosci. Model Dev.*, 17, 8569–8592, <https://doi.org/10.5194/gmd-17-8569-2024>, 2024.
- Szekely, T., Gourrion, J., Pouliquen, S. & Reverdin, G.: The CORA 5.2 dataset for global in situ temperature and salinity  
585 measurements: data description and validation. *Ocean Science*, 15(6), 1601-1614. <https://doi.org/10.5194/os-15-1601-2019>, 2019

- Trewin, B.: Assessing internal variability of global mean surface temperature from observational data and implications for reaching key threshold, *J. Geophys. Res.-Atmos.*, 127, e2022JD036747, <https://doi.org/10.1029/2022JD036747>, 2022.
- 590 Visser, H., Dangendorf, S., van Vuuren, D. P., Bregman, B., and Petersen, A. C.: Signal detection in global mean temperatures after “Paris”: an uncertainty and sensitivity analysis, *Clim. Past*, 14, 139–155, <https://doi.org/10.5194/cp-14-139-2018>, 2018.
- von Schuckmann, K., Moreira, L., Cancet, M., Gues, F., Autret, E., Baker, J., Bricaud, C., Bourdalle-Badie, R., Castrillo, L., Cheng, L., Chevallier, F., Ciani, D., de Pasual-Collar, A., De Toma, V., Drevillion, M., Fanelli, C., Garric, G., Gehlen, M., Giesen, R., Hodges, K., Iovino, D., Jandt-Scheelke, S., Jansen, E., Juza, M., Karagali, I., Lavergne, T., Masina, S., McAdam, R., Minière, A., Morrison, H., Panteleit, T.R., Pisano, A., Pujol, M.-I., Stoffelen, A., Thual, S., Van Gennip, S., Veillard, P.,  
 595 Yang, C., and Zuo, H.: The state of the global ocean, *State of the Planet*, 4, 1-30, <https://doi.org/10.5194/sp-4-osr8-1-2024>, 2024.
- Wills, R. C., Schneider, T., Wallace, J. M., Battisti, D. S., and Hartmann, D. L.: Disentangling global warming, multidecadal variability, and El Niño in Pacific temperatures, *Geophys. Res. Lett.*, 45, 2487–2496, <https://doi.org/10.1002/2017GL076327>, 2018.
- 600 Wills, R. C. J., Battisti, D. S., Armour, K. C., Schneider, T., and Deser, C.: Pattern recognition methods to separate forced responses from internal variability in climate model ensembles and observations, *J. Climate*, 33, 8693–8719, <https://doi.org/10.1175/JCLI-D-19-0855.1>, 2020.
- Wu, Z., Huang, N. E., Wallace, J. M., et al.: On the time-varying trend in global-mean surface temperature, *Clim. Dyn.*, 37, 759–773, <https://doi.org/10.1007/s00382-011-1128-8>, 2011.
- 605 Yu, M. and Ruggieri, E.: Change point analysis of global temperature records, *Int. J. Climatol.*, 39, 3679–3688, <https://doi.org/10.1002/joc.6042>, 2019.
